# Supplementary material
Source: Research Square preprint supplement (doi:10.21203/rs.3.rs-9590848/v1)
Supplement: Supplementary file 1 [file ad6b3aa2242717ac62a634bd.docx]

# Supplementary Figures

**
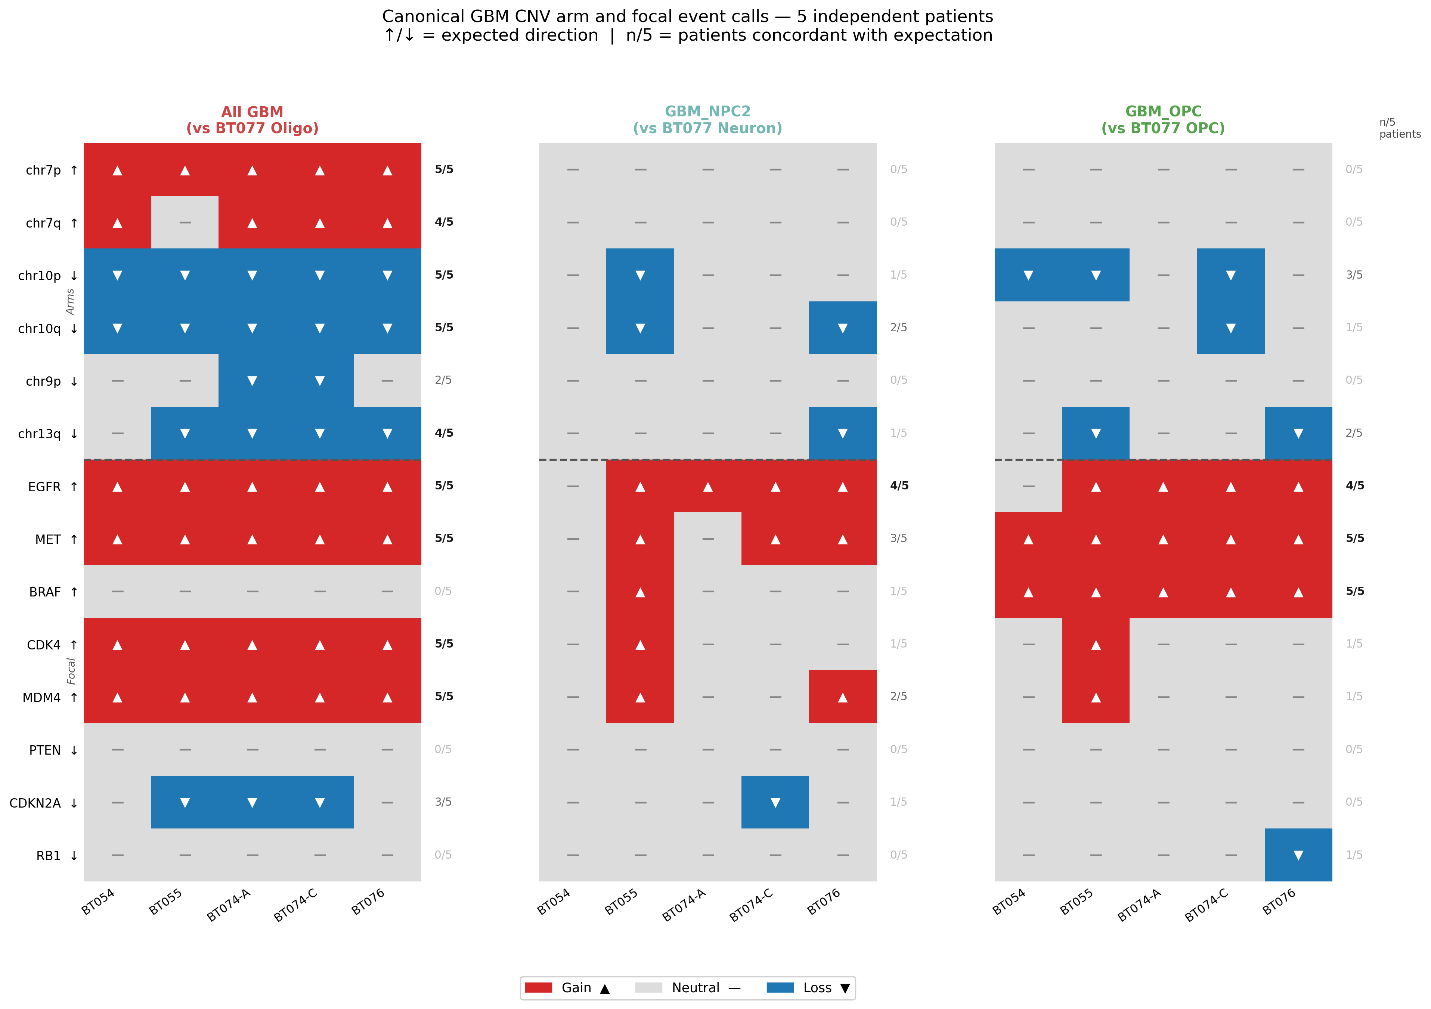
**

**
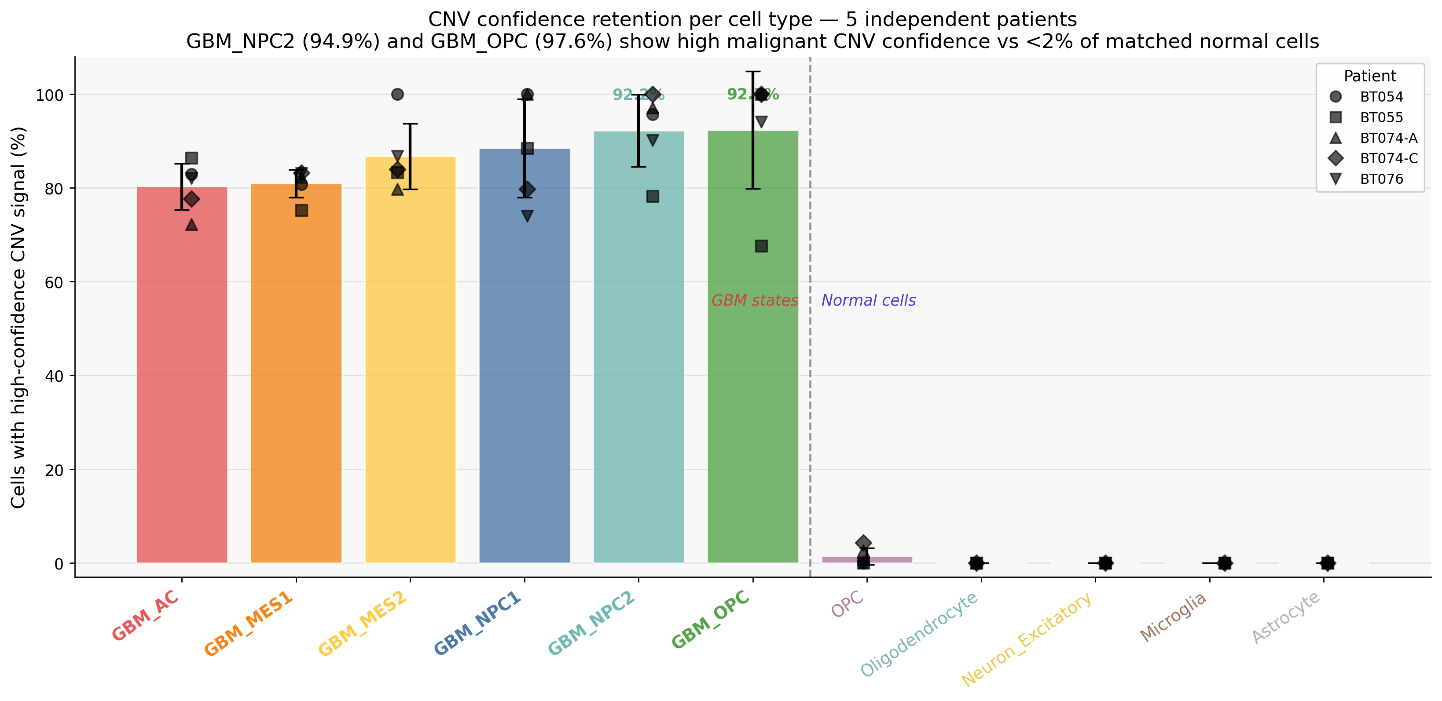
**

**
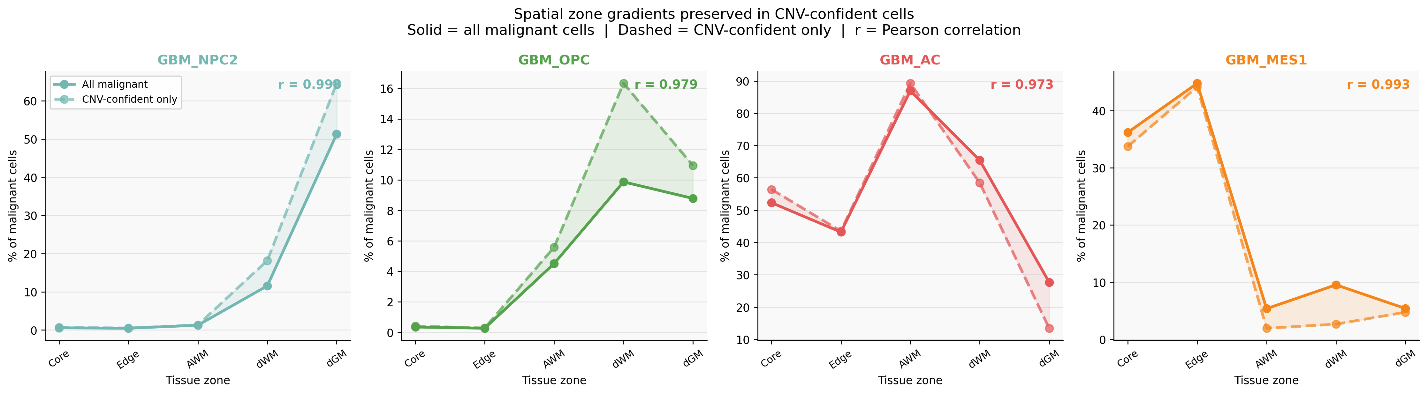

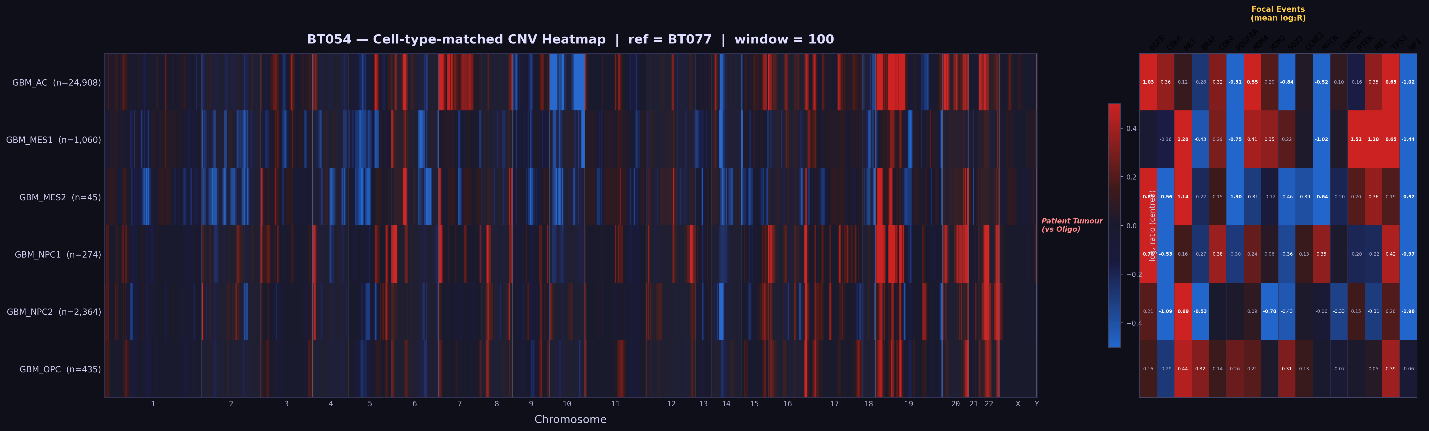

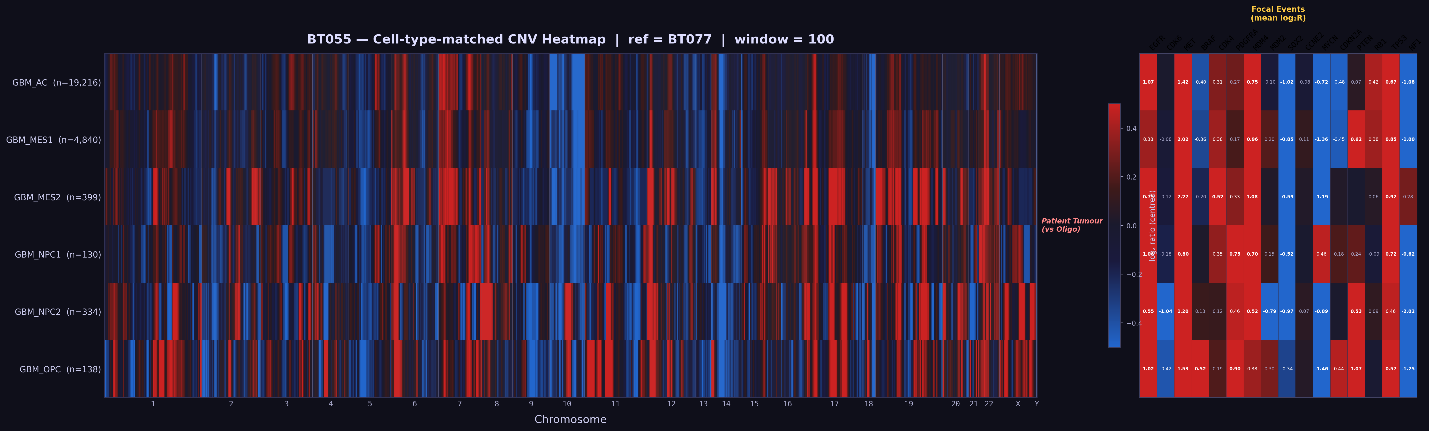

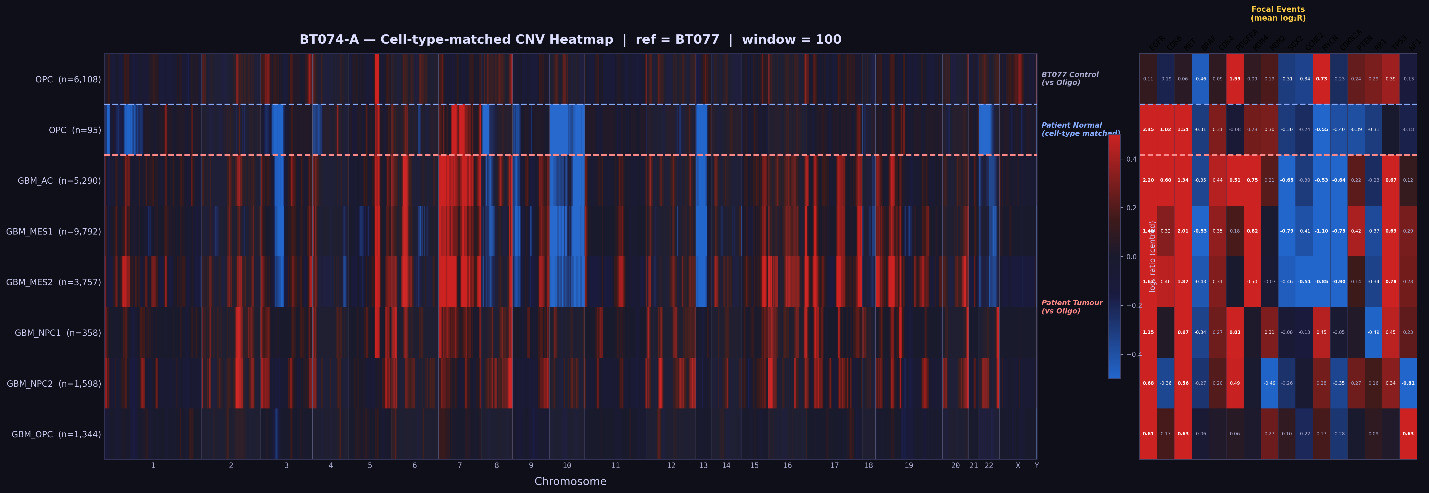

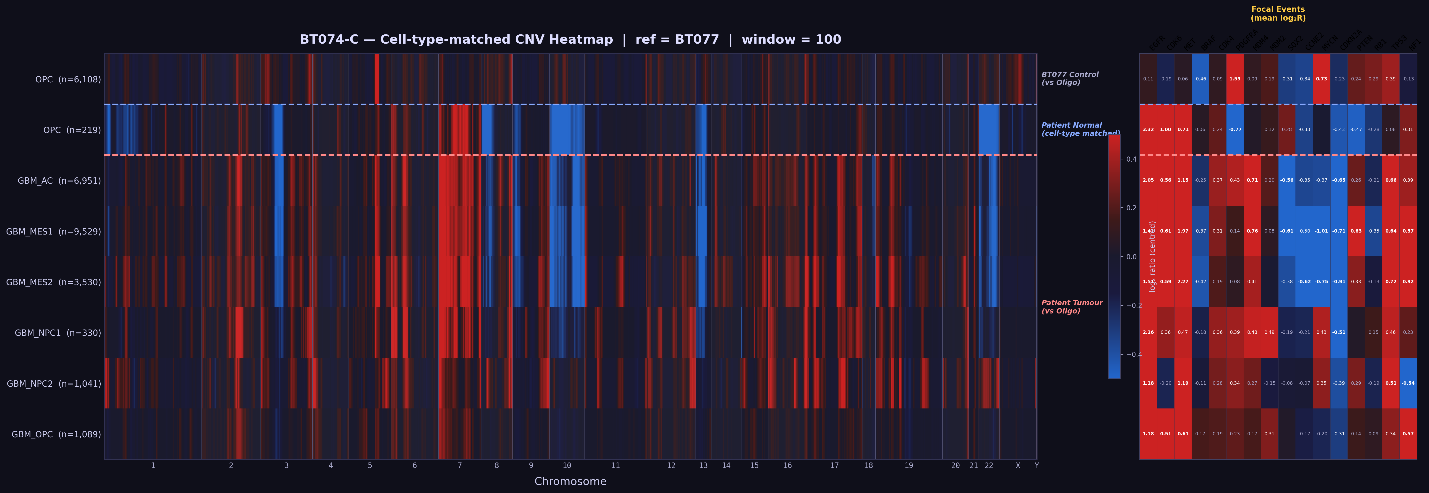

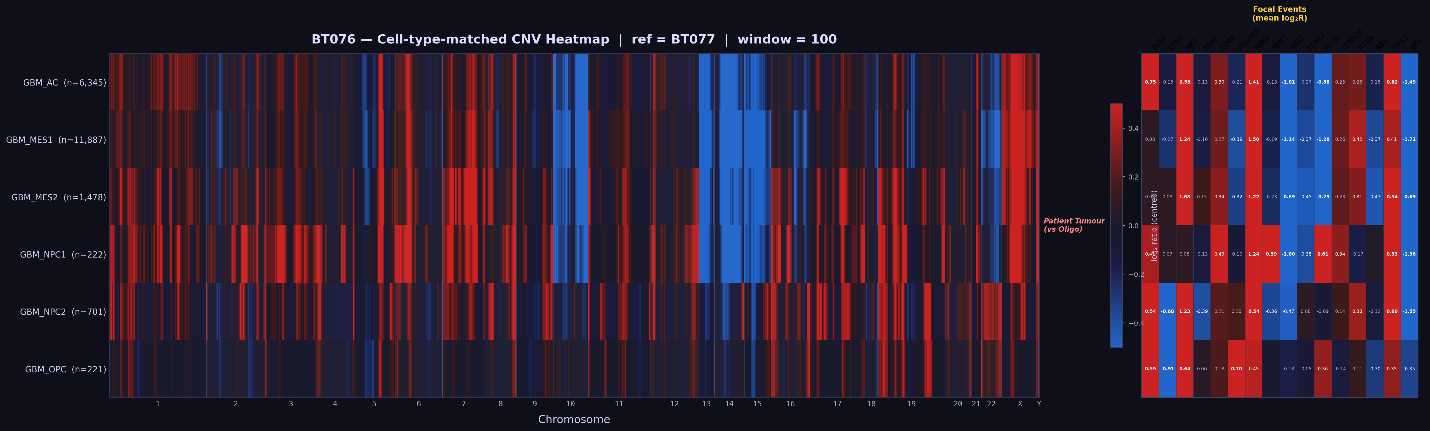
**

**Supplementary Figure 1. CNV malignancy validation.**

Three-panel summary of the patient-level pseudo-bulk CNV analysis used to validate malignancy across the five GB patients (BT054, BT055, BT074-A, BT074-C, BT076). For each patient, raw counts were aggregated across malignant cells and across cell-type-matched BT077 reference cells, normalized to counts per million, and the log2(tumour/reference) ratio was computed per gene and smoothed across chromosomal position (rolling median, window = 100 genes; |Z| > 2 vs the BT077 reference distribution called as significant). The analysis confirmed hallmark glioblastoma alterations, chromosome 7 gain and chromosome 10 loss in 4 of 5 patients, with concordant focal EGFR amplification calls, across cell-type-matched reference panels (AC-like vs. oligodendrocyte; MES1/MES2-like vs. oligodendrocyte; NPC-like vs. neuron; OPC-like vs. OPC). The complementary per-cell CNV calls produced by `cnv_group_flex` v3.6 (Supplementary Figure 18; Methods) are concordant with the patient-level signal at the lineage level.


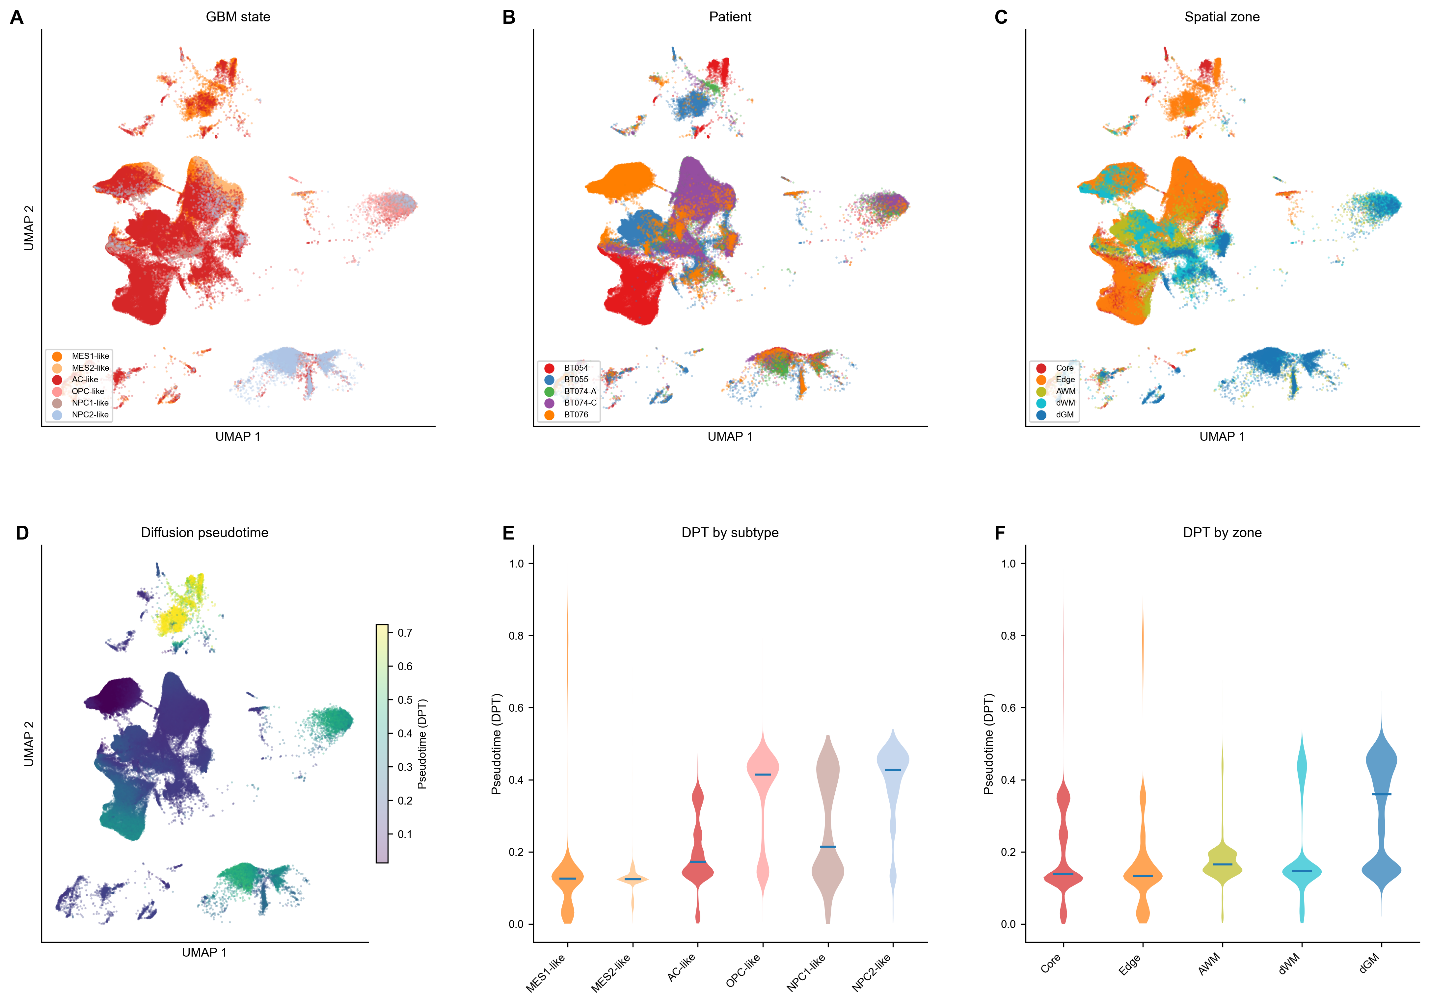


**Supplementary Figure 2. GB malignant cell UMAP coloured by state, patient, and spatial zone.**

Three-panel UMAP restricted to malignant cells (n = 144,089). Left: Neftel et al. (2019) malignant state annotation (AC-like, MES1-like, MES2-like, NPC1-like, NPC2-like, OPC-like, Unassigned). Centre: patient of origin (BT054, BT055, BT074-A, BT074-C, BT076). Right: spatial zone of origin (Core, Edge, AWM, dWM, dGM).

**
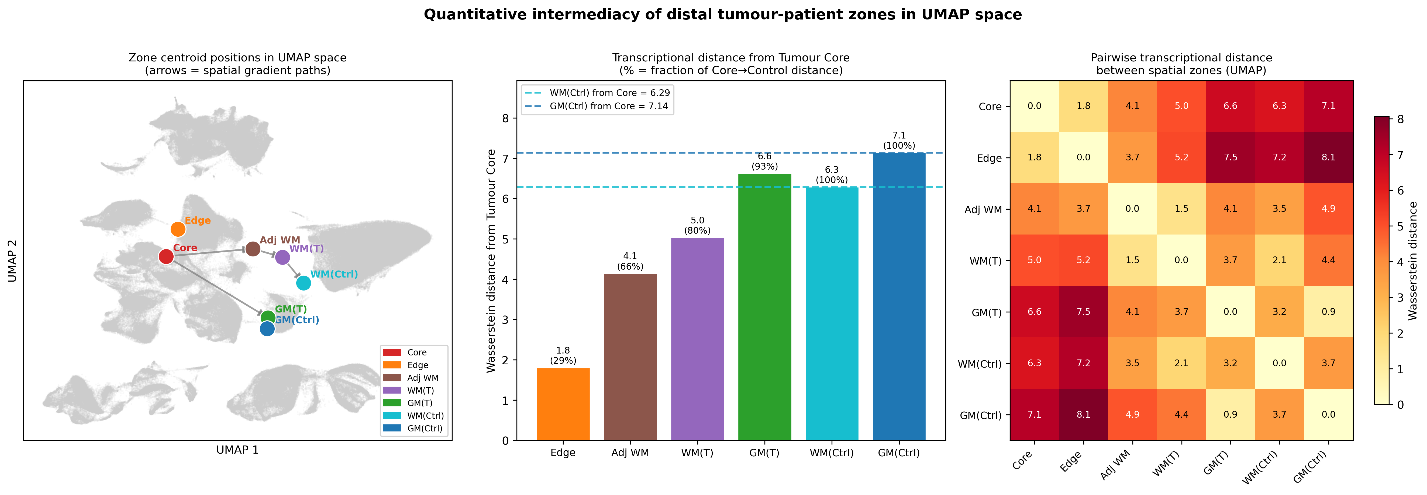
**

**Supplementary Figure 3. Wasserstein distance analysis of transcriptional intermediacy across spatial zones.**

A) Wasserstein distance (earth mover's distance) from the tumour core UMAP distribution to each of the remaining 6 spatial zones . B) Distances computed from 2D UMAP coordinates shown as a barplot, with 5,000 cells subsampled per zone per iteration; values averaged across 10 subsampling runs. Dashed reference lines indicate the Core-to-control distance for WM(Ctrl) and GM(Ctrl). Bars annotated with percentage of the Core-to-matched-control distance: dWM 80%, dGM 92.8%. C) A heatmap of pairwiseWasserstein transcriptional distances show both OID compartments retain a measurable residual transcriptional distance from matched non-oncological control tissue (dWM residual 2.07 UMAP distance units; dGM 0.89 units). Together, these distances quantify a progressive but incomplete normalisation of the malignant transcriptome along the OID, with even the most distal compartments (dWM, dGM) retaining a measurable residual divergence from matched non-oncological control tissue.


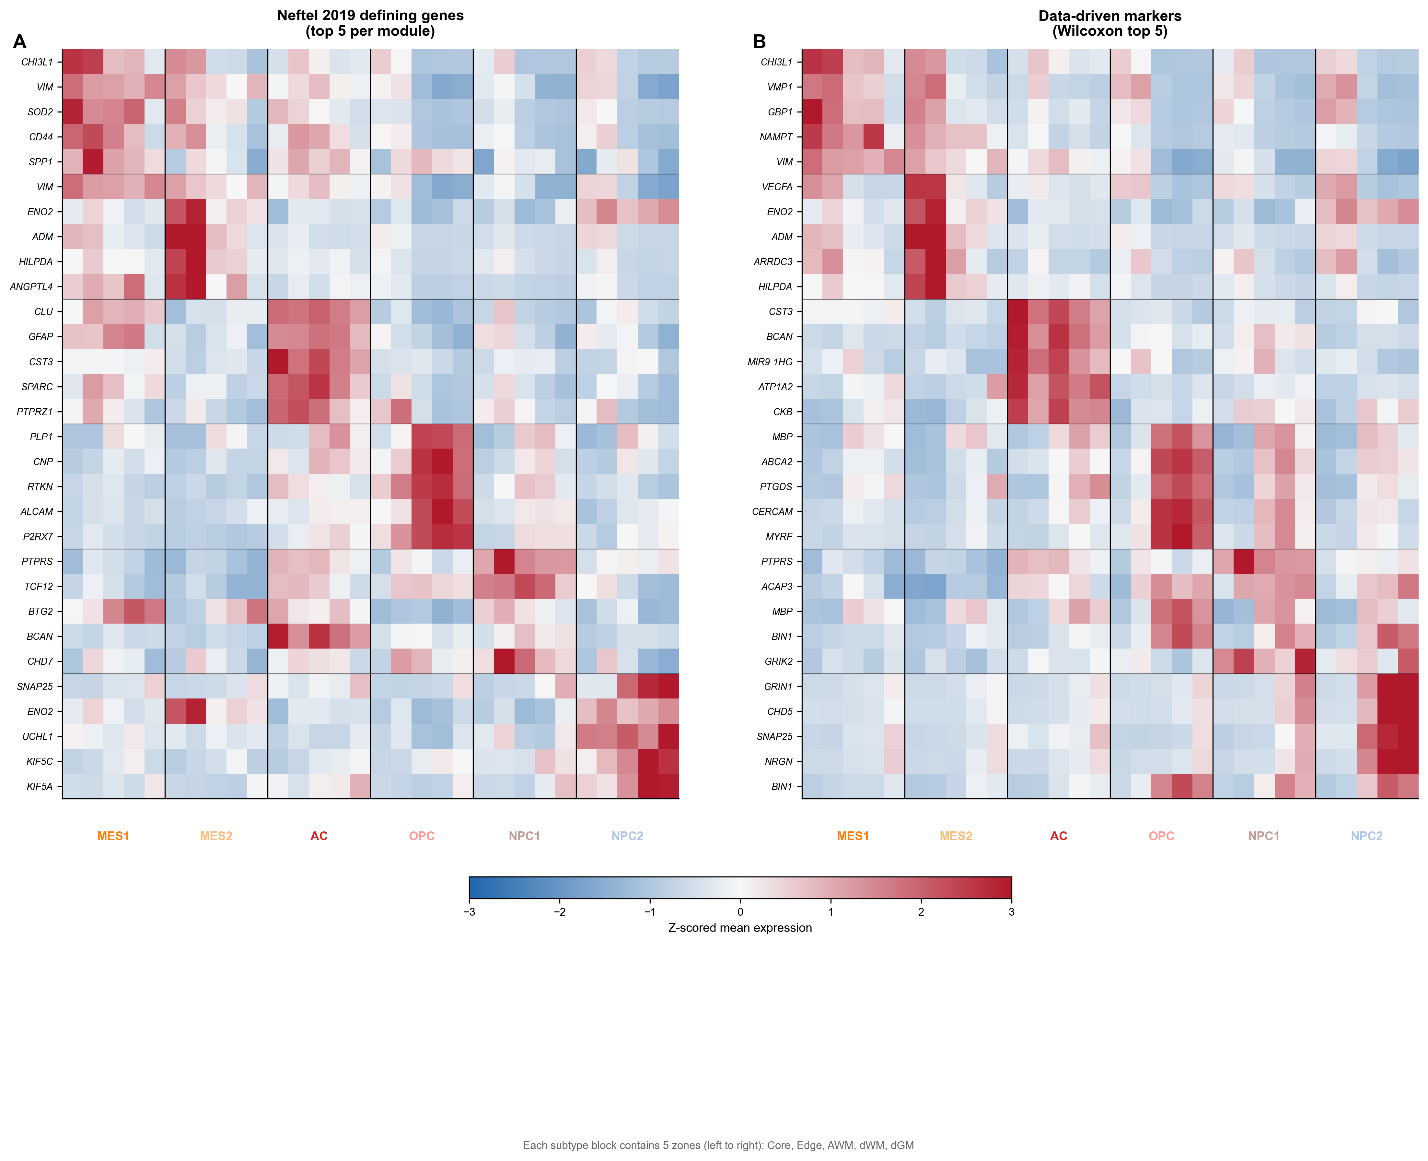

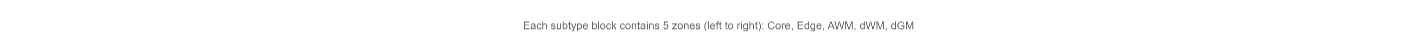


**Supplementary Figure 4. Comparison of Neftel 2019 defining genes and data-driven marker genes across spatial zones.**

**(A)** the top 5 Neftel et al. (2019) module genes per subtype (ranked by mean expression within the defining subtype) and **(B)** the top 5 data-driven marker genes per subtype (Wilcoxon rank-sum, each subtype vs all other malignant cells). Both heatmaps show mean log-normalised expression per subtype per zone, z-scored per gene (row), clipped at +/-3. The block-diagonal pattern (subtype-specific enrichment) and spatial gradients (MES markers declining distally, NPC2/OPC markers increasing distally) are concordant across both gene sets, confirming that spatial transcriptional variation is robust to gene set choice. Gene overlap between Neftel and data-driven top 5: MES2 3/5 shared (ENO2, ADM, HILPDA); MES1 2/5 (CHI3L1, VIM); AC 1/5 (CST3); NPC2 1/5 (SNAP25); OPC 0/5. n = 144,089 malignant cells.


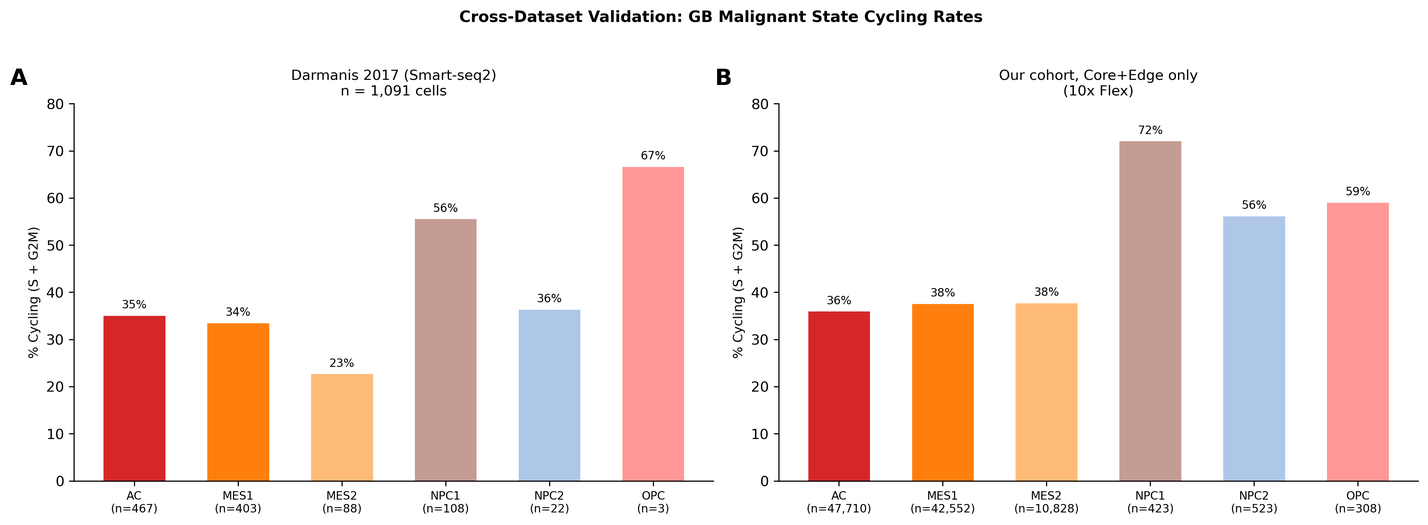


**
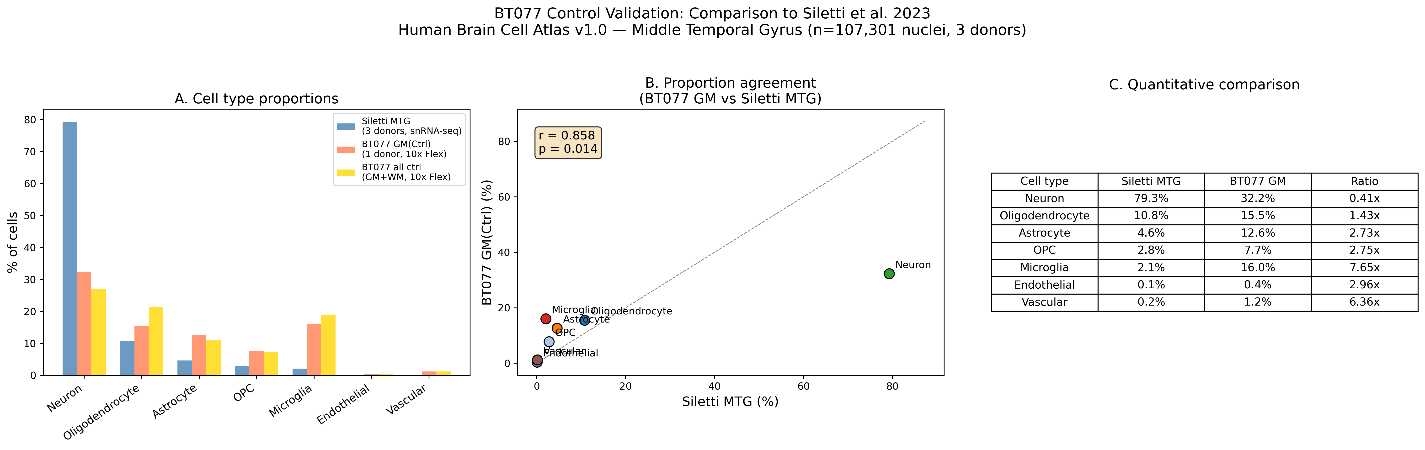
**

**Supplementary Figure 5. External validation.**

(A) GB cycling comparison: Darmanis et al. 2017 (Smart-seq2, n = 1,091 cells) vs current cohort (10x Flex, n = 144,089). Cycling fractions compared at Core + Edge only (fair comparison: Darmanis tissue was tumour mass). Close concordance for abundant subtypes: AC-like 36.0% vs 35.1% (n = 47,710 vs 467); MES1-like 37.6% vs 33.5% (n = 42,552 vs 403). Greater divergence for rare subtypes reflects limited Darmanis statistical power (NPC2-like n = 22; OPC-like n = 3). (B) Non-oncological control GM(Ctrl) cell type composition vs Siletti et al. 2023 Human Brain Cell Atlas (MTG region, n = 107,301). Pearson r = 0.858, p = 0.014. Neuronal underrepresentation (32.2% vs 79.3%) reflects expected technology bias (nuclei vs cells). Non-neuronal populations preserve relative ordering. (C) Quantitative comparison table.


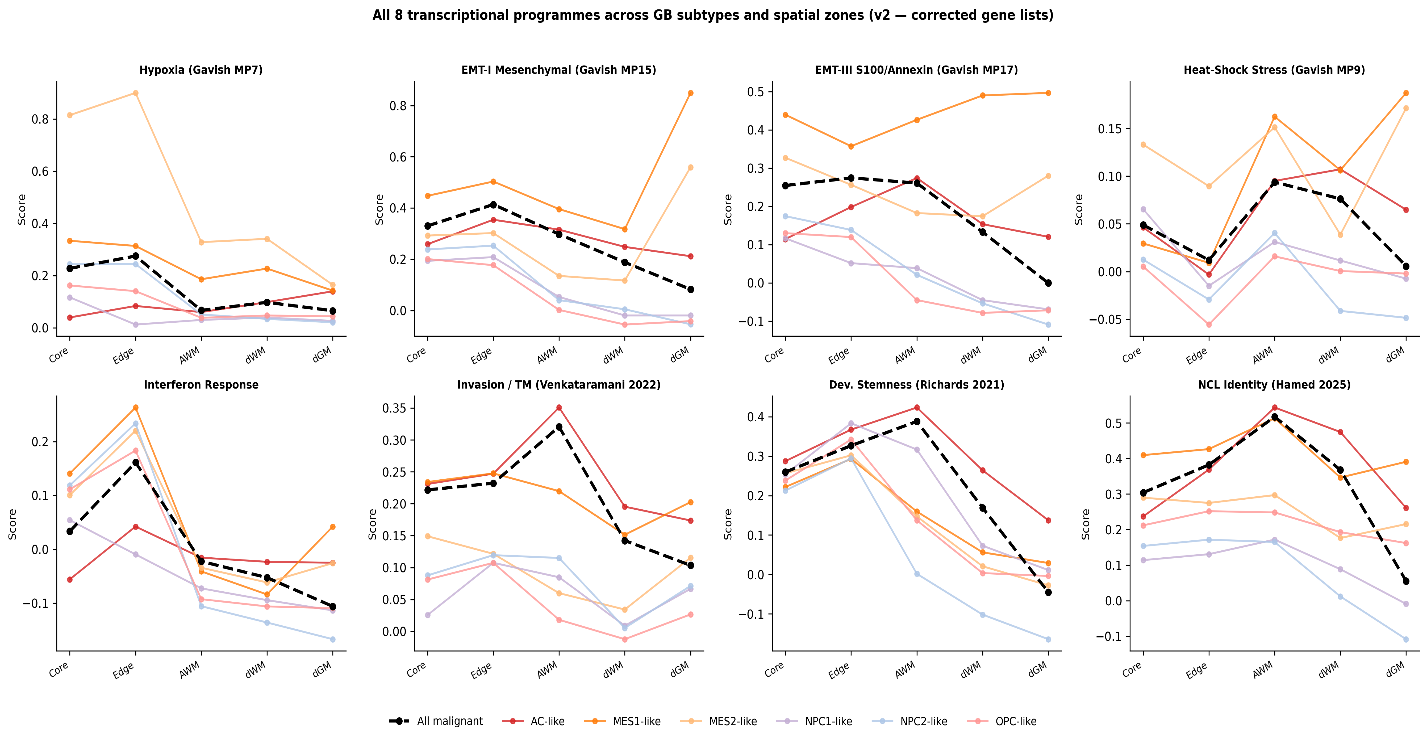


**Supplementary Figure 6. Transcriptional program scores across GB malignant subtypes and spatial zones.**

Mean program score per subtype per zone for the eight published GB transcriptional programs scored in this study (gene lists in Supplementary Table 14). (A) Hypoxia (MP7; Gavish et al. 2023) - highest in MES2-like cells at the Core (0.829), declining sharply across the OID; in MES2-like cells, score falls from 0.814 at Core to 0.165 in dGM. (B) EMT-I Mesenchymal (MP15) - concentrated in MES1/MES2-like cells at Core and Edge, near baseline distally. (C) EMT-III S100/Annexin (MP17) - co-localises with the EMT-I signature in mesenchymal subtypes at the tumour mass. (D) Heat-Shock Stress (MP9) - broadly distributed across malignant subtypes within tumour-proximal zones, declining distally. (E) Interferon Response - peaks at the tumour edge in MES1-like cells (0.263 at Edge, declining to near-zero across the OID), consistent with an immune-interface signature. (F) Invasion / Tumour Microtube (Venkataramani et al. 2022) - peaks at AWM in AC-like cells (0.351), elevated above Core, identifying the active invasion front. (G) Developmental Stemness (Richards et al. 2021) - peaks at AWM in AC-like cells (0.423), indicating a progenitor-like state at the leading edge. (H) Neural-Crest-Like identity (NCL; Hamed et al. 2025; 12 NCC identity markers, injury-associated genes excluded) - highest in AC-like cells at AWM (0.543), with elevated expression persisting through the OID. The dashed black line in each panel shows the all-malignant mean per zone. Scores computed with sc.tl.score_genes (Scanpy 1.12) using the same expression-stable background; n = 144,089 malignant cells across the five tumour zones. Two additional cell-state-specific programs - neural mimicry (NPC2-like neuronal resemblance) and OPC lineage (OPC-like oligodendroglial resemblance) - are scored on the same cells but shown in the main figures (Fig. 2E, 2F).


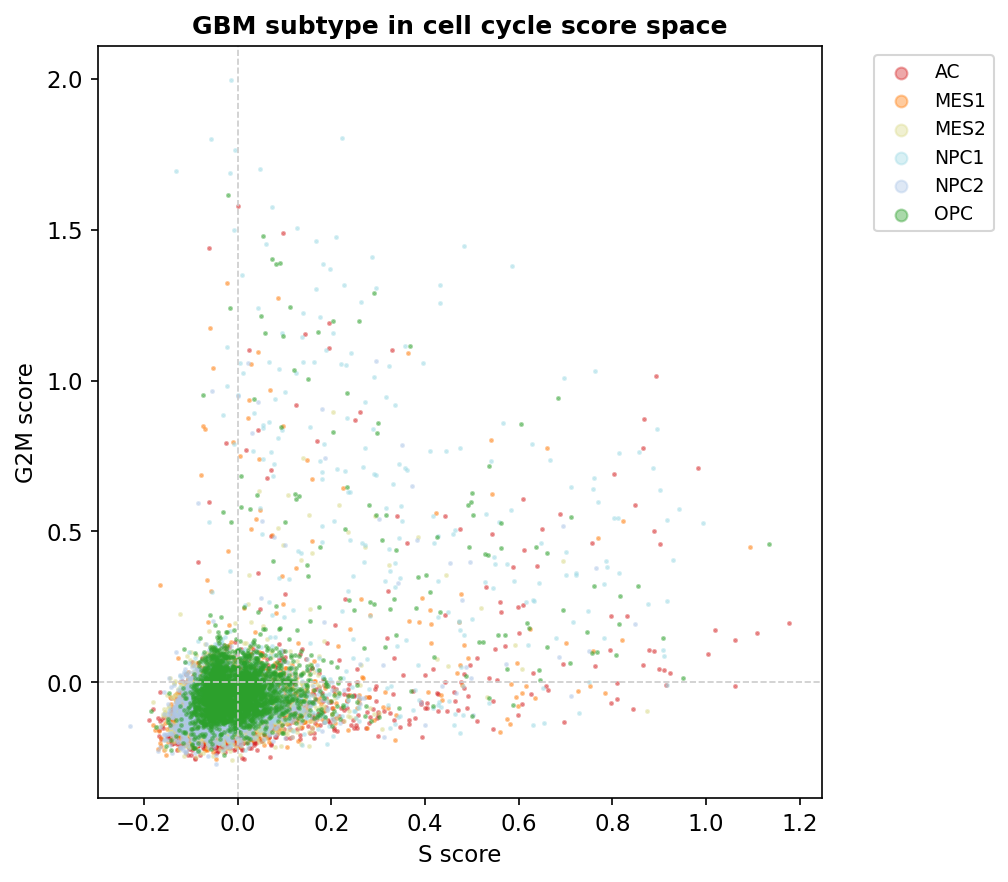

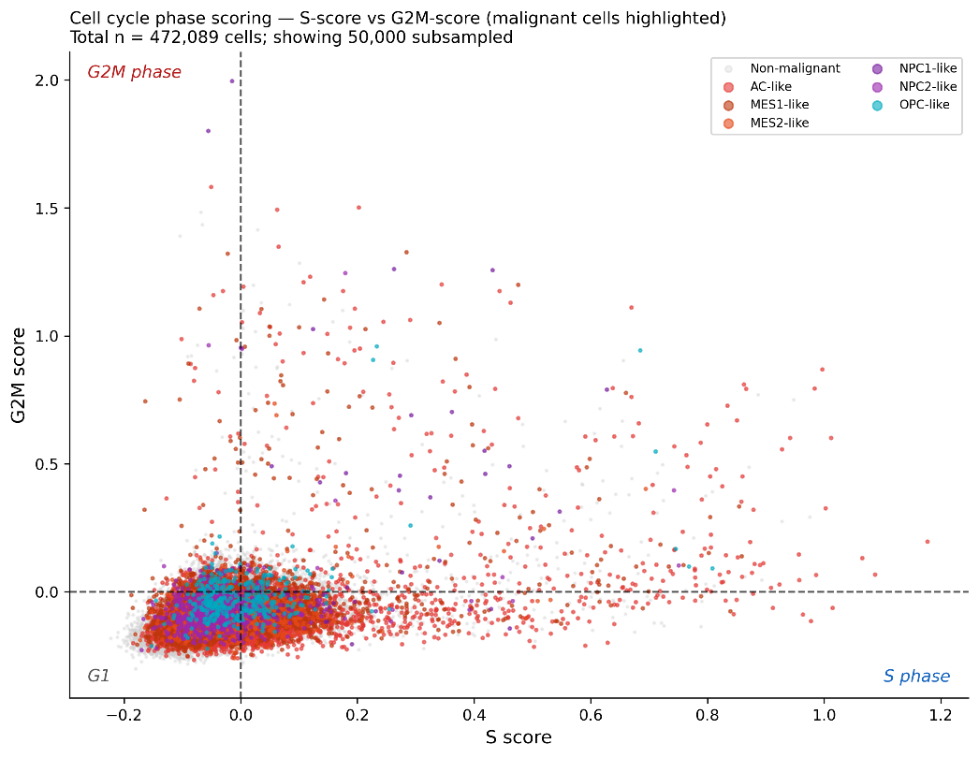


**Supplementary Figure 7. Cell cycle phase scoring validation across cell types.**

(A) G2M score vs S score scatter for all malignant cells (n = 144,089), with phase assignment based on the Tirosh et al. (2016) S-phase and G2/M gene sets scored via Scanpy sc.tl.score_genes_cell_cycle (cells with G2M > 0 and G2M > S assigned to G2M; cells with S > 0 and S ≥ G2M assigned to S; remaining cells assigned to G1). Threshold cutoffs are shown as dashed lines. (B) S vs G2M score scatter coloured by GB malignant subtype, confirming subtype-specific cycling differences.

**
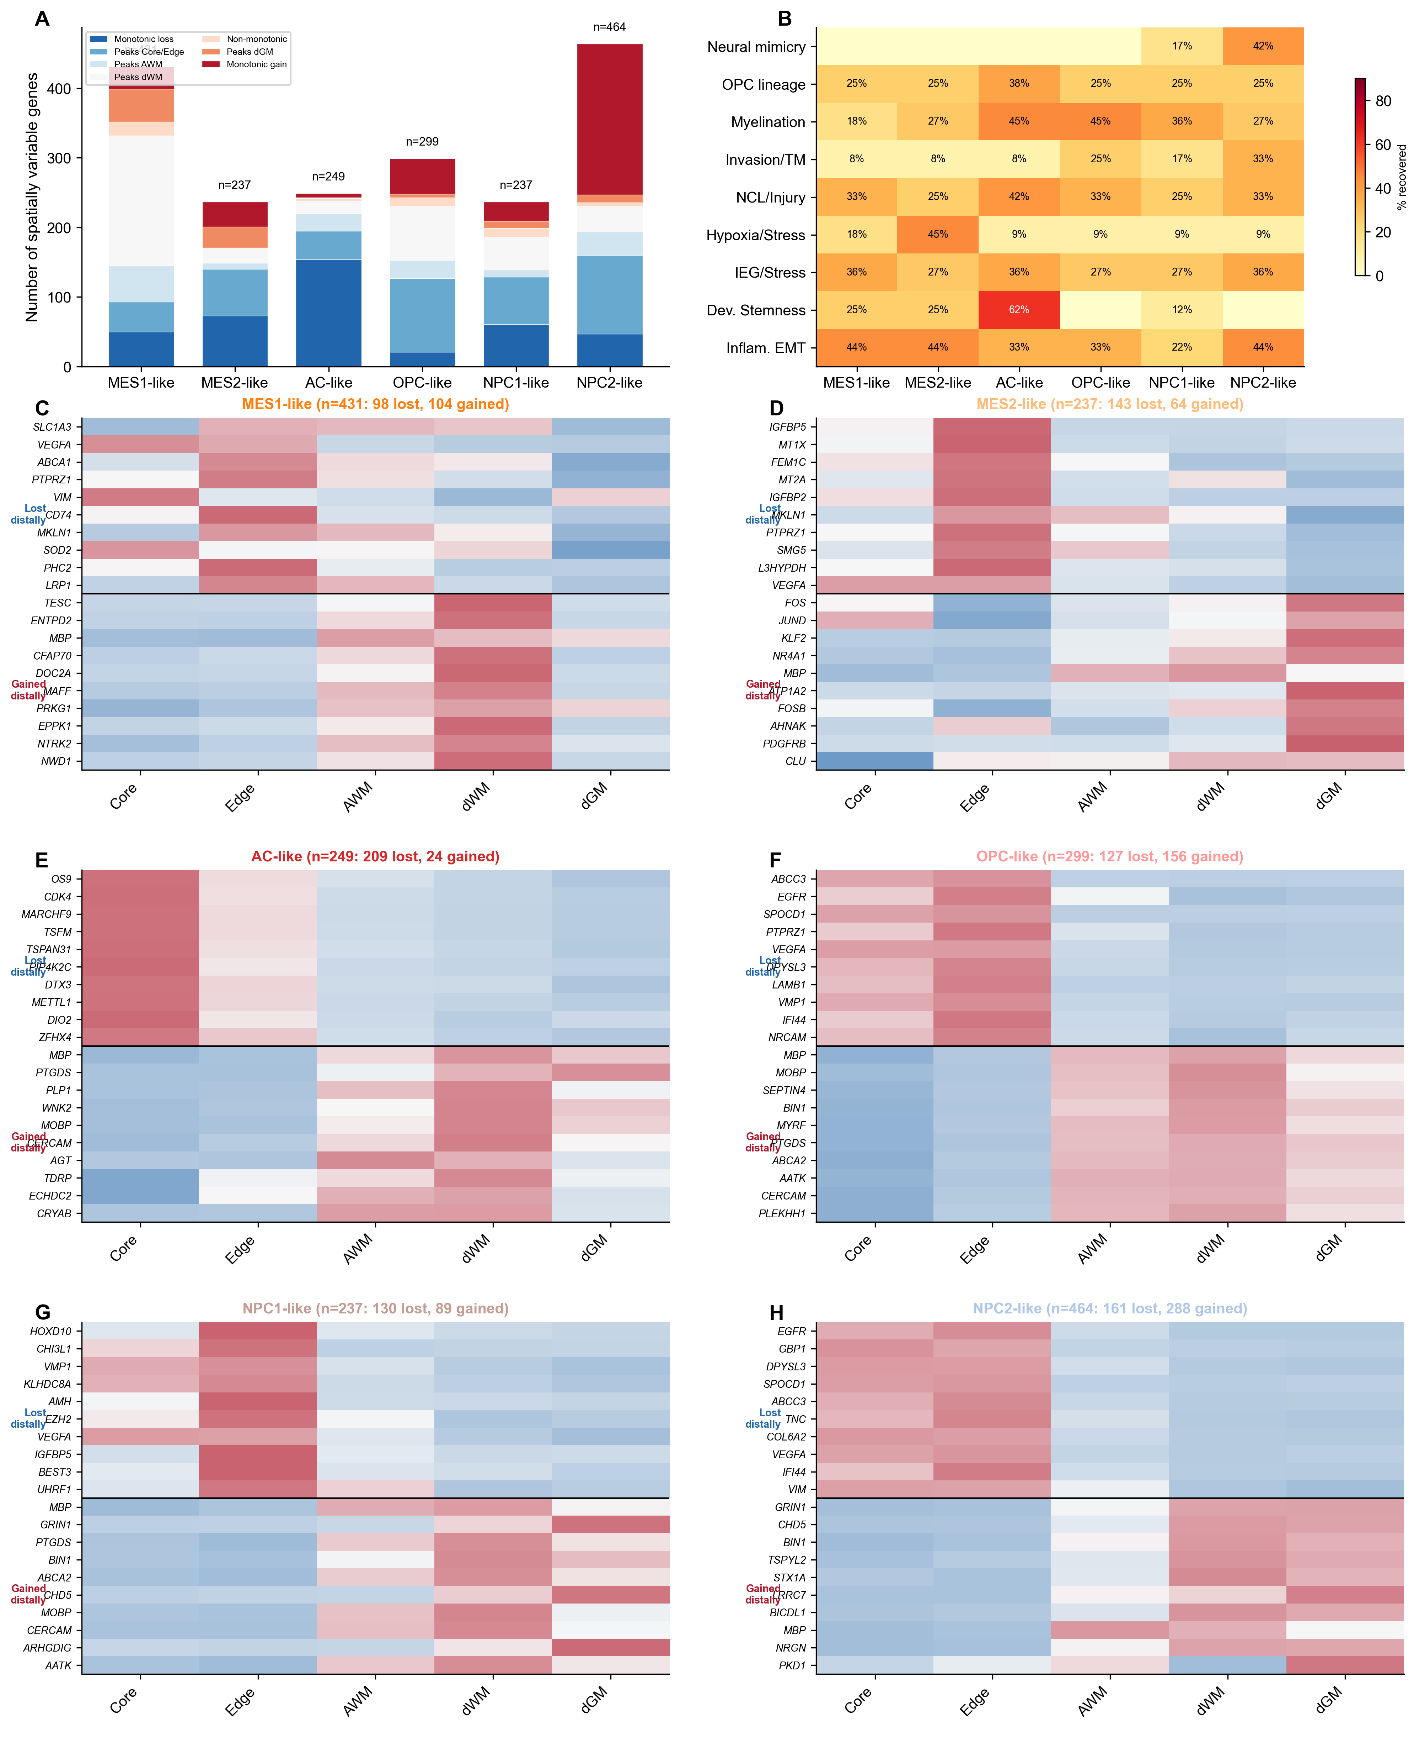
**


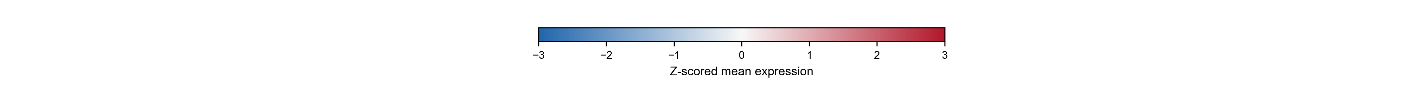


**Supplementary Figure 8. Cell type specific transcriptional changes across space for malignant cells.**

**(A)** The number of spatially variable genes per malignant cell (n = 144,089 malignant cells) subtype as a stacked barplot with spatial pattern (Core to distal) as colour (Kruskal-Wallis H test across 5 tumour zones; FDR < 0.05, effect size > 0.7, no contamination filter). The NPC2-like cells have the most gained-distally genes (288) while the AC-like has the most decreased-distally genes (209). **(B)** A heatmap showing percentage of predefined transcriptional program genes recovered by malignant cell types. We see considerable overlap between NPC2 x Neural Mimicry 42% (5/12); OPC x Myelination 45% (5/11); AC x Dev. Stemness 62% (5/8); MES2 x Hypoxia 45% (5/11). **(C–H)** Per-subtype heatmaps showing expression z-scores the top 10 genes reduced distally and top 10 genes gained distally for each of the 6 malignant subtypes (AC-like, MES1-like, MES2-like, NPC1-like, NPC2-like, OPC-like). Genes ranked by Kruskal-Wallis H statistic; raw mean expression values annotated where ≥ 0.3. NPC2-like gained genes include neuronal identity markers (GRIN1, CHD5, SNAP25, NRGN), while OPC-like gained genes include oligodendrocyte lineage markers (MBP, MOBP, MYRF, PLP1) and MES1/MES2 lost genes include hypoxia/stress markers (VEGFA, IGFBP2).


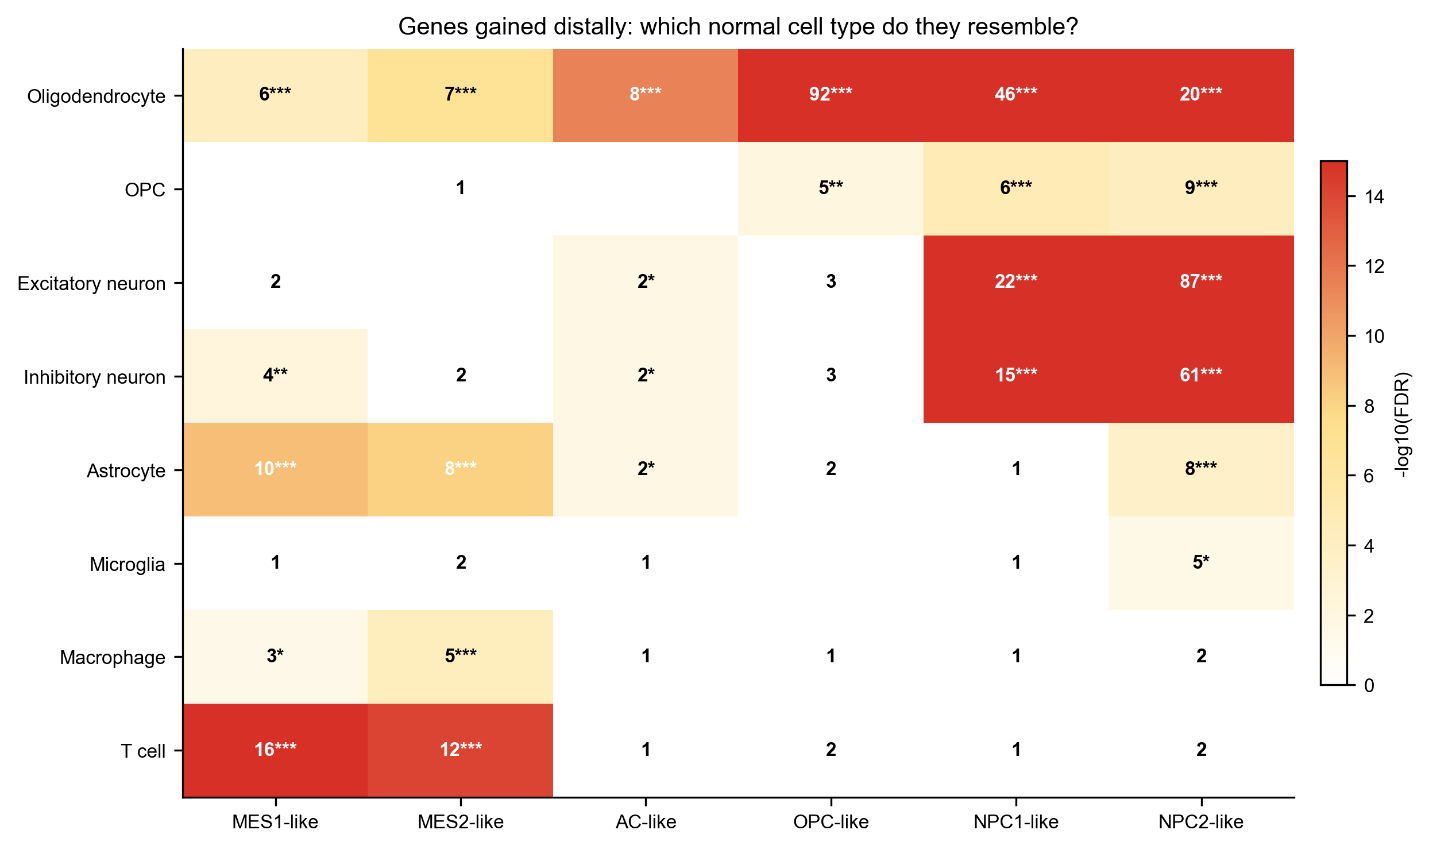


**Supplementary Figure 9. Agnostic cell type identity test: spatially gained genes overlap with normal cell type markers.**

Heatmap showing -log10(FDR) from Fisher's exact test comparing each malignant subtype's gained-distally genes against independently derived normal cell type markers (top 100 markers per type, Wilcoxon rank-sum on 328,000 non-malignant cells; logFC > 0.5, FDR < 0.01). Numbers indicate gene overlap; asterisks indicate significance (* FDR < 0.05, ** FDR < 0.01, *** FDR < 0.001). Key results: OPC-like gained-distally genes overlap with 92/100 oligodendrocyte markers (FDR = 2.0 x 10^-193); NPC2-like gained-distally genes overlap with 87/100 excitatory neuron markers (FDR = 1.0 x 10^-146) and 61/100 inhibitory neuron markers (FDR = 5.1 x 10^-85). Both gene lists are independently data-derived. No curated gene lists used.


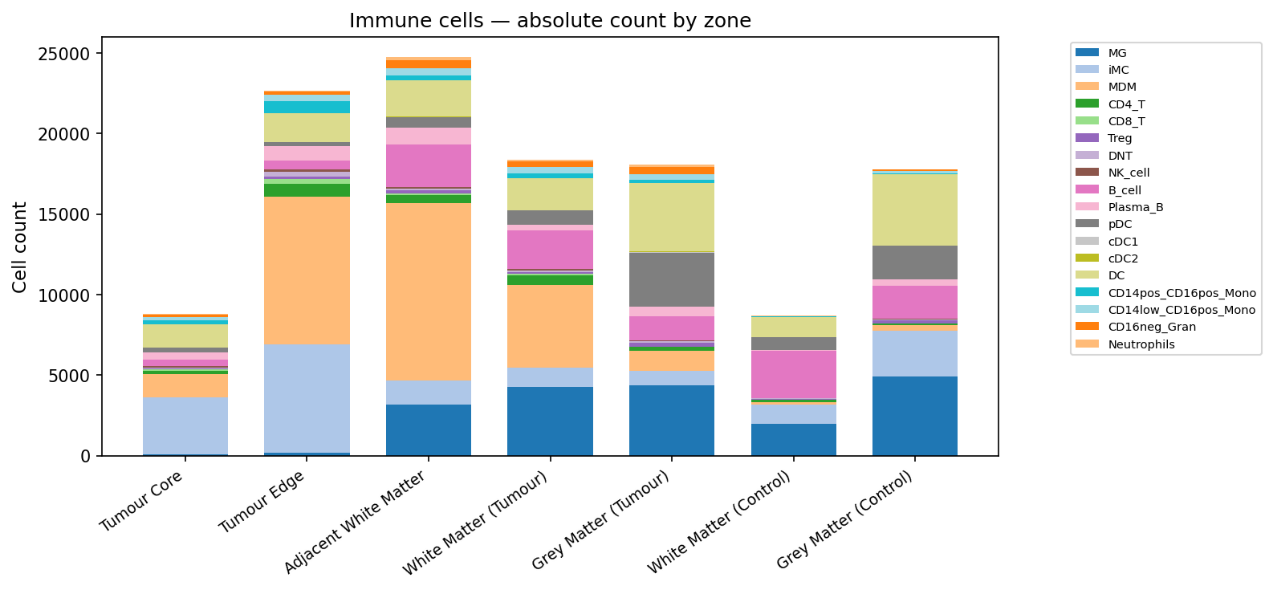

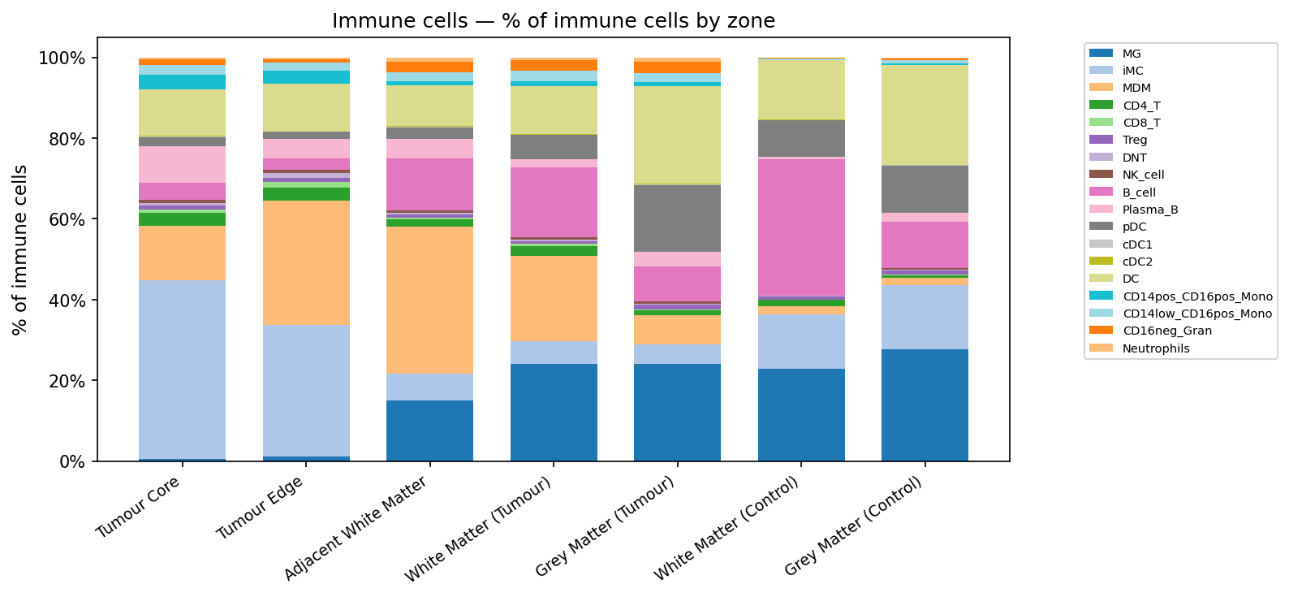


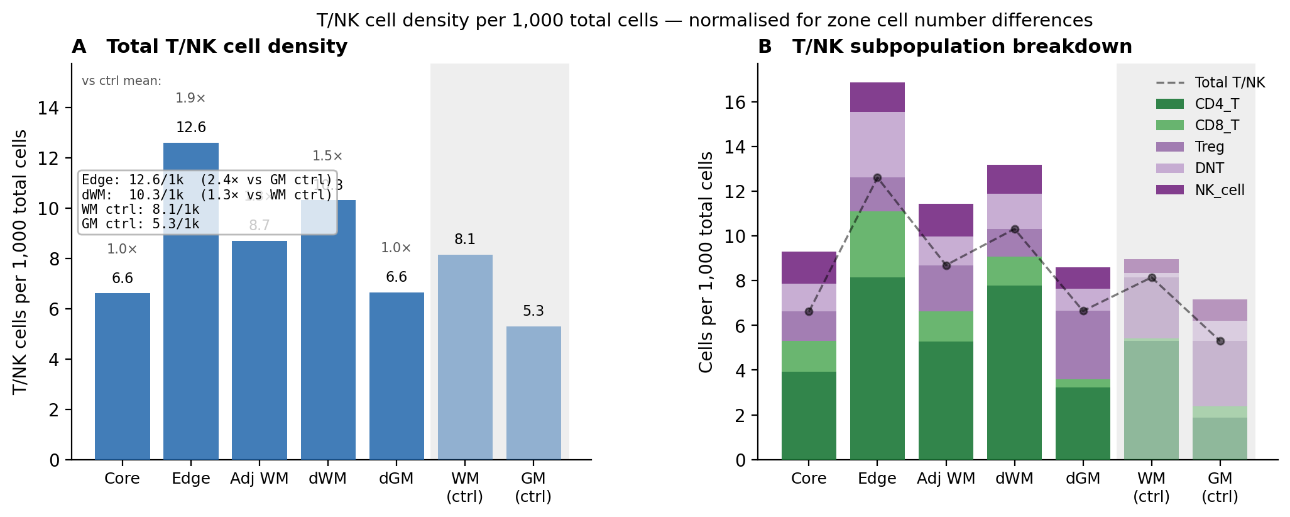


**Supplementary Figure 10. Immune deepdive: absolute and relative immune populations by zone.**

**(A)** Absolute immune cell counts per zone for all 18 immune subpopulations (cells per 1,000 total cells). **(B)** Relative immune composition (% of CD45+ cells) per zone. **(C)** T cell density heatmap (T cells per 1,000 total cells) per zone and per subpopulation. Cluster-modal assignment. n = 119,164 immune cells.


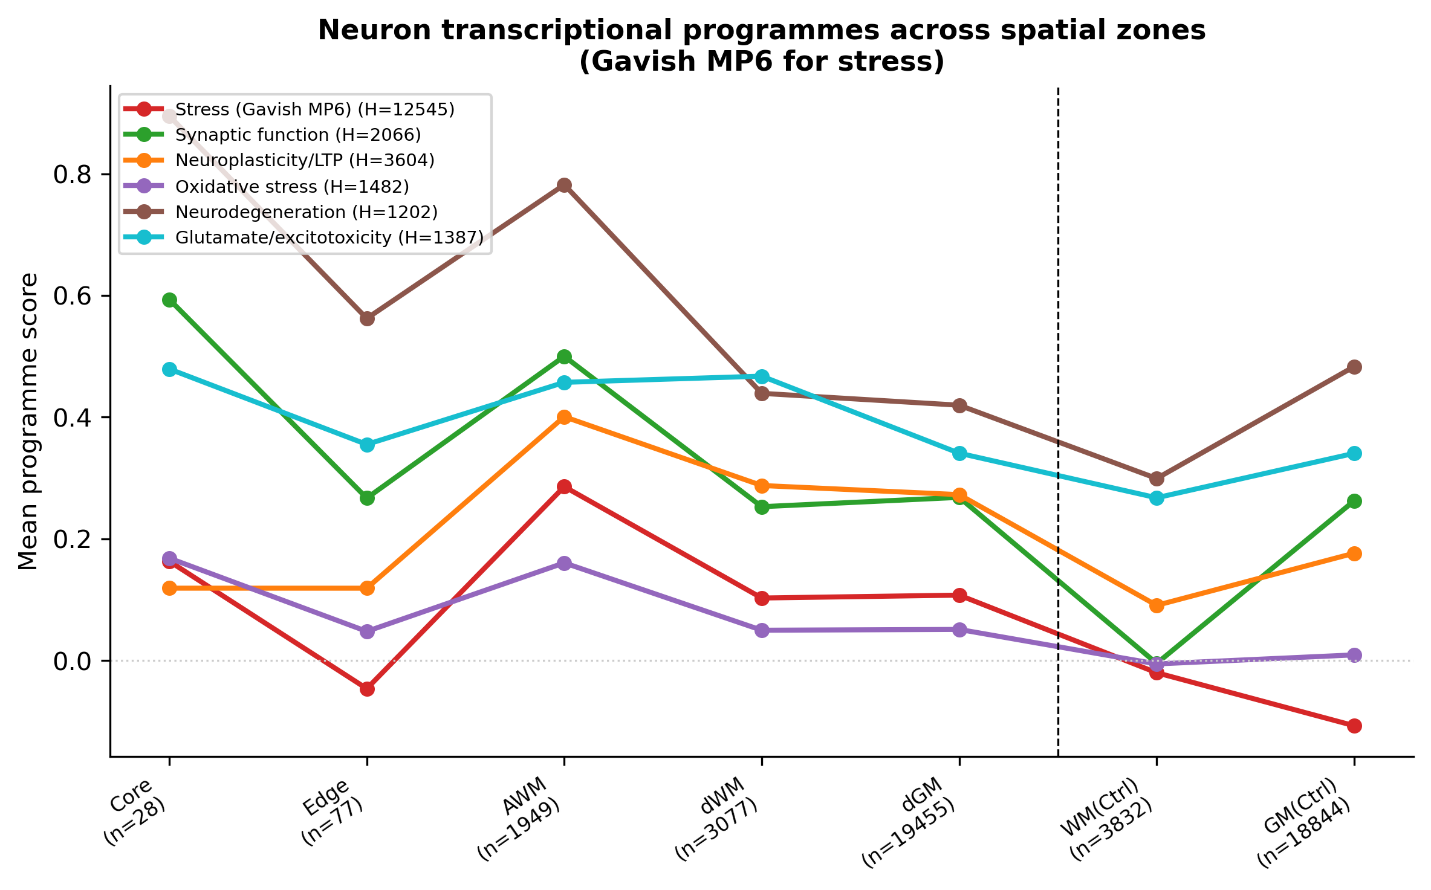


**Supplementary Figure 11. Neuron transcriptional program scores across spatial zones.**

Line plots showing score distributions for six transcriptional programs across the seven spatial zones. Diamonds indicate zone mean; n per zone shown beneath the x-axis. The dashed vertical line separates GB-patient zones from non-oncological control zones. The MP6 stress/injury program (Gavish et al. 2023 Stress 1 meta-program; 49 genes from the 3CA Supplementary Table; KW H = 12,817) is elevated in all five GB-patient zones relative to pooled non-oncological control (Mann-Whitney U with Benjamini-Hochberg FDR; AWM, dWM and dGM all FDR < 2.2 × 10⁻³⁰⁸), and remains elevated in macroscopically normal-appearing dGM and dWM. The five additional neuron programs - synaptic function, neuroplasticity/LTP, oxidative stress, neurodegeneration, and glutamate/excitotoxicity (gene lists in Methods and Supplementary Table 14) - are shown alongside MP6 to contextualise the stress signature within the broader neuronal transcriptional state. n = 47,262 neurons.


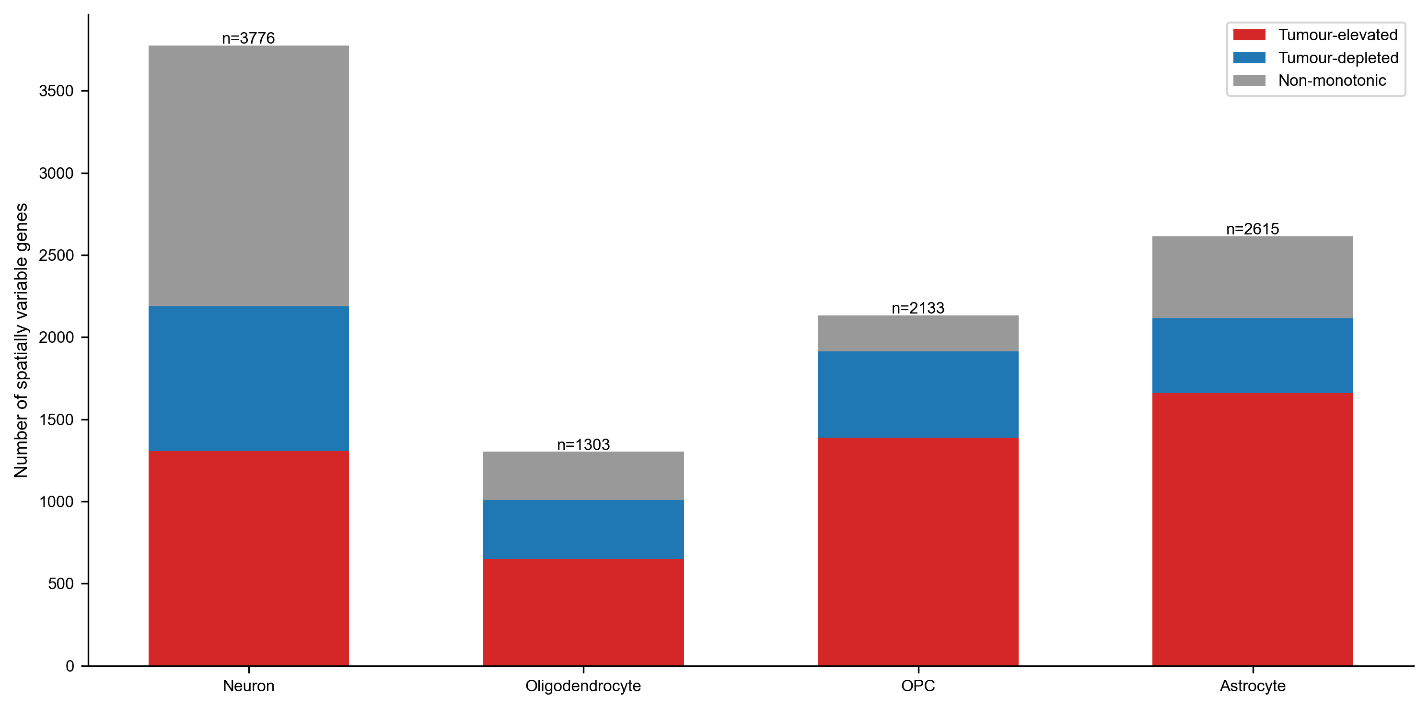


**Supplementary Figure 12. Spatially variable genes in non-malignant cell types across the tumour-to-control axis.**

Stacked bar chart showing the number of spatially variable genes per non-malignant cell type (Kruskal-Wallis H test across 5 tumour-patient zones; FDR < 0.05, effect size > 0.3, minimum 3% expression, tumour patients only). Genes classified by direction: tumour-elevated (red; higher expression in tumour-proximal zones), tumour-depleted (blue; higher expression in distal/control-adjacent zones), or non-monotonic (grey; no consistent spatial trend). Neurons had the most spatially variable genes (3,776), followed by astrocytes (2,615), OPCs (2,133), and oligodendrocytes (1,303). The majority of astrocyte spatially variable genes were tumour-elevated (1,659/2,615; 63.4%), consistent with pervasive reactive state induction. OPCs showed a similar tumour-elevated bias (1,389/2,133; 65.1%). Neurons had the largest non-monotonic fraction (1,589/3,776; 42.1%), reflecting complex zone-dependent transcriptional programs including concurrent stress induction and synaptic preservation. n = 328,000 non-malignant cells across 5 tumour patients.


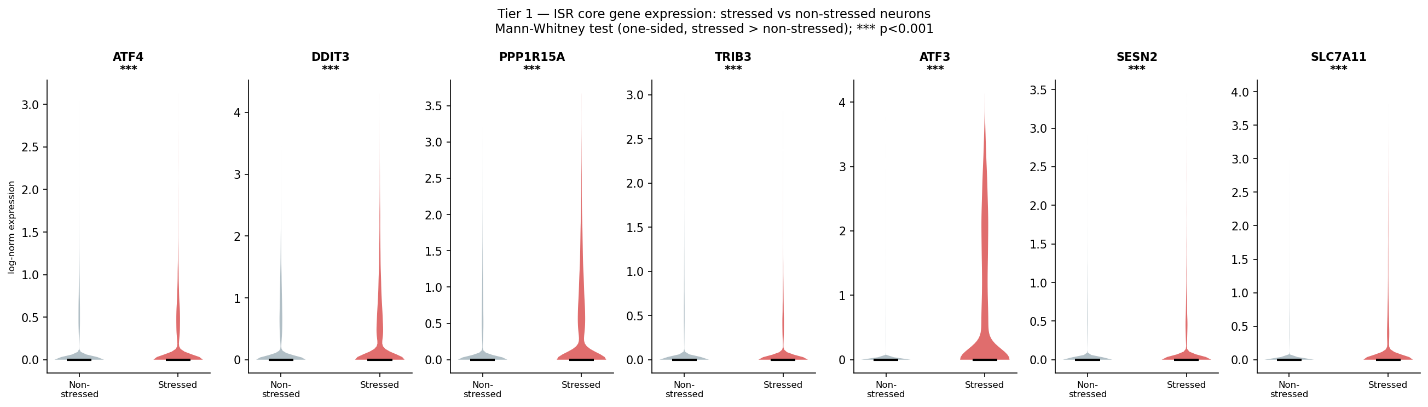

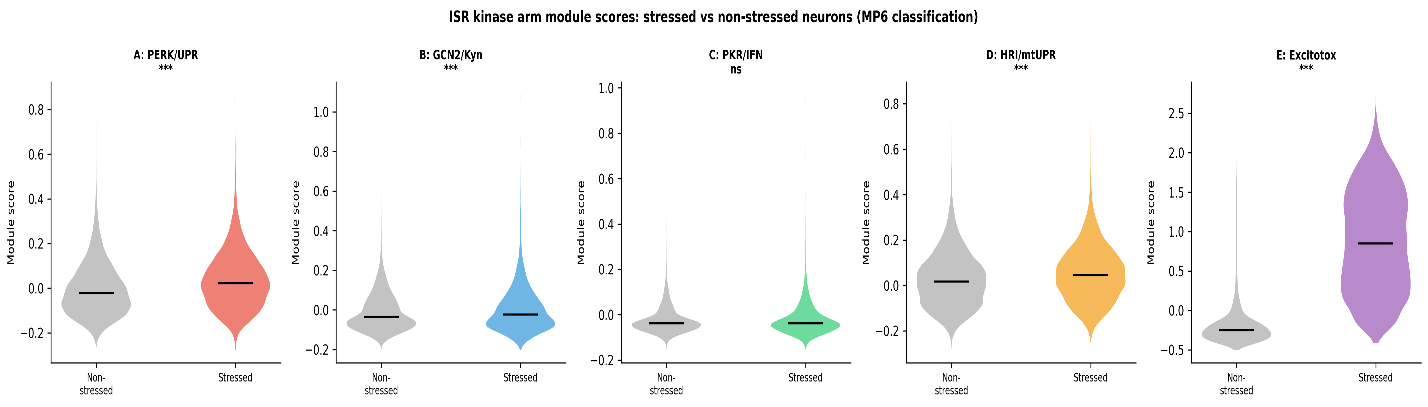


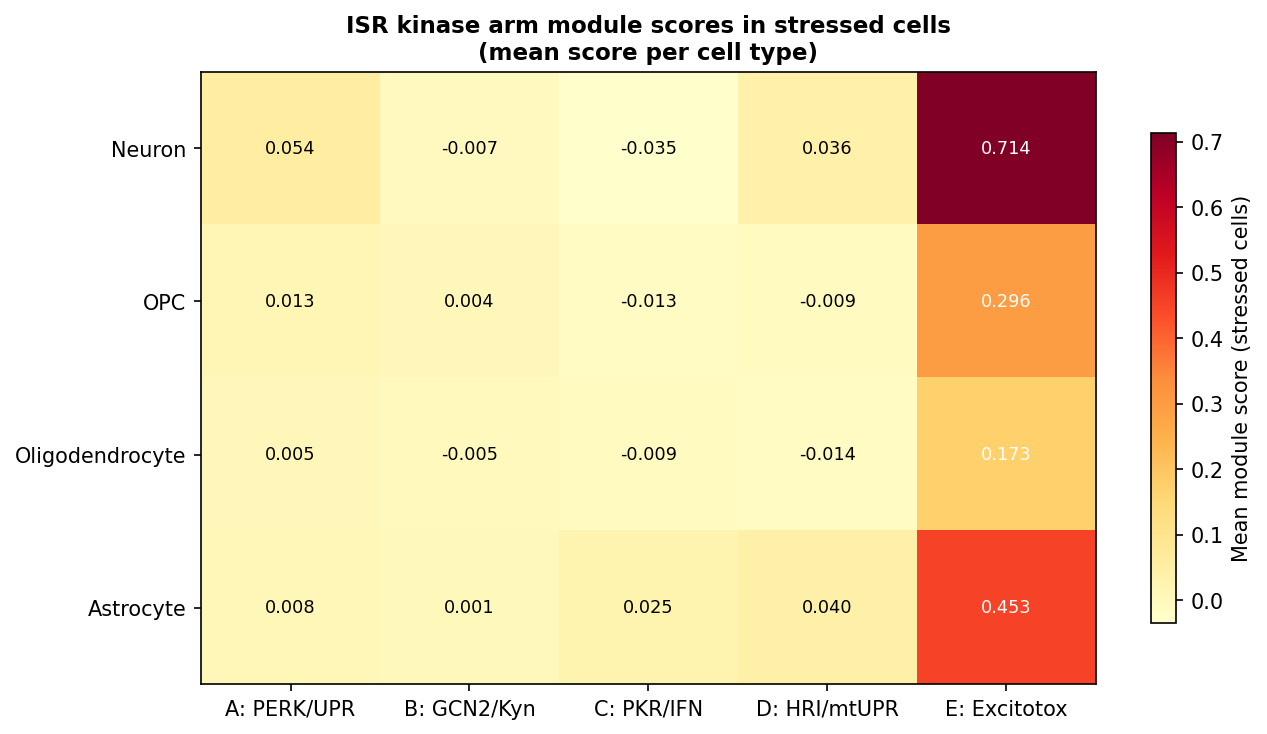


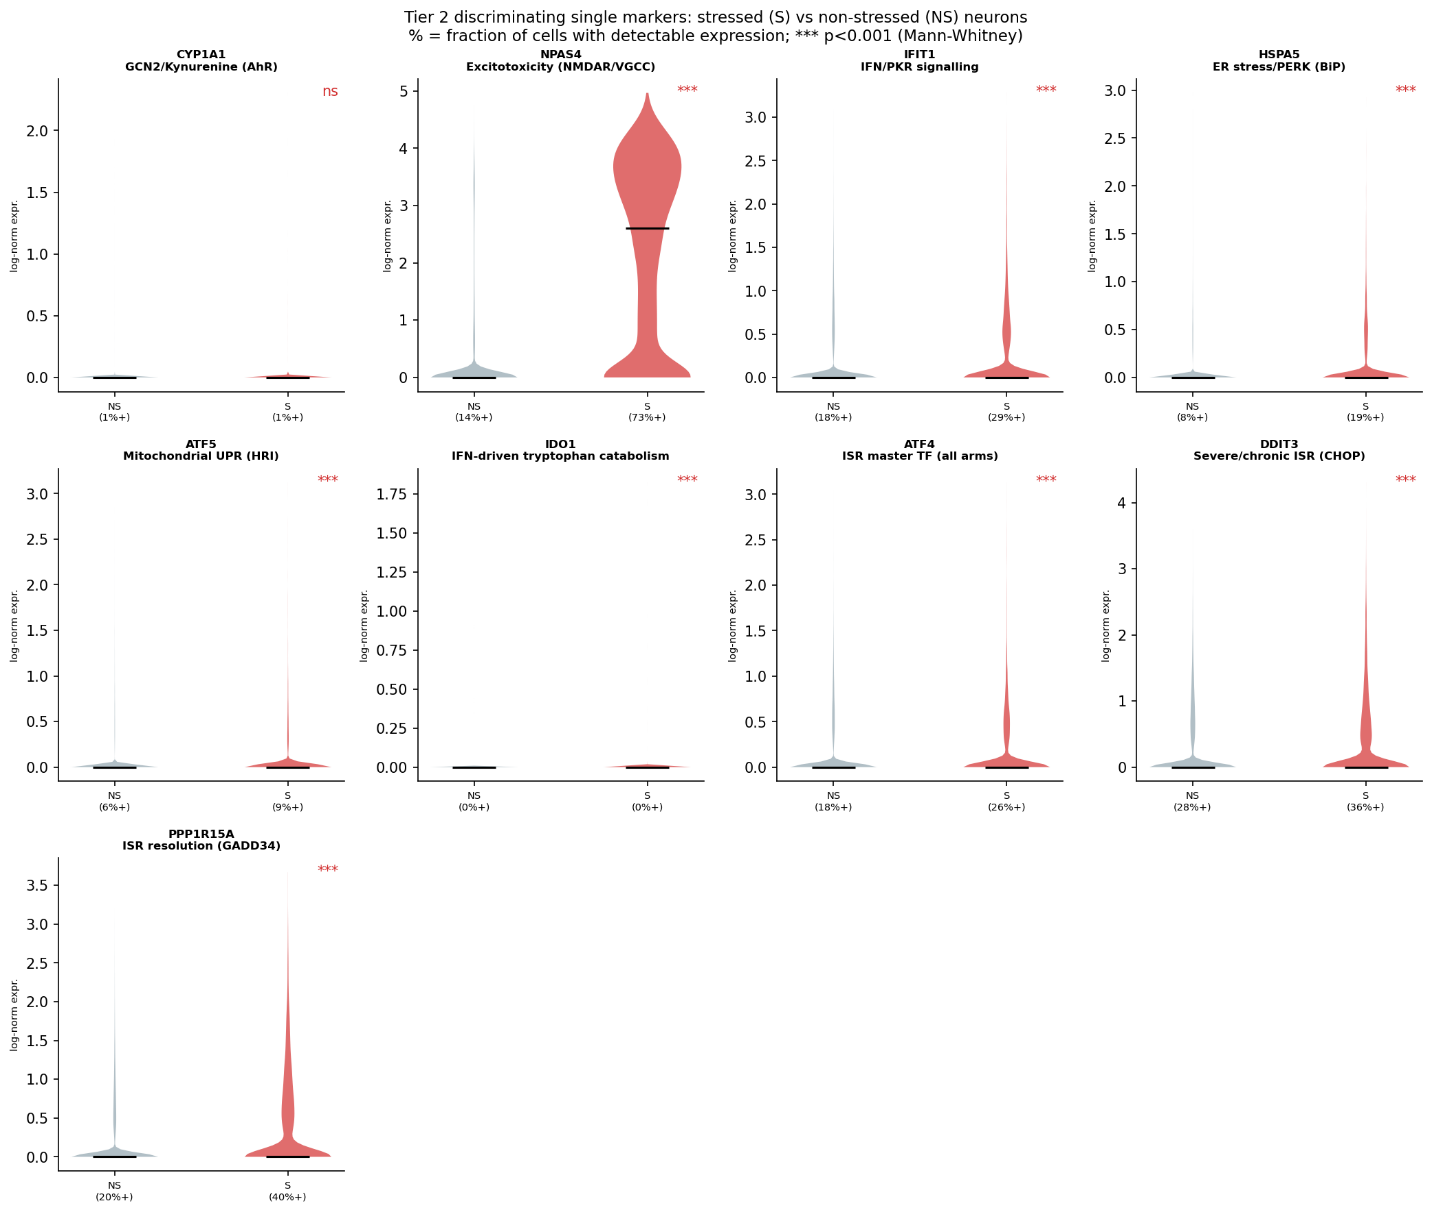


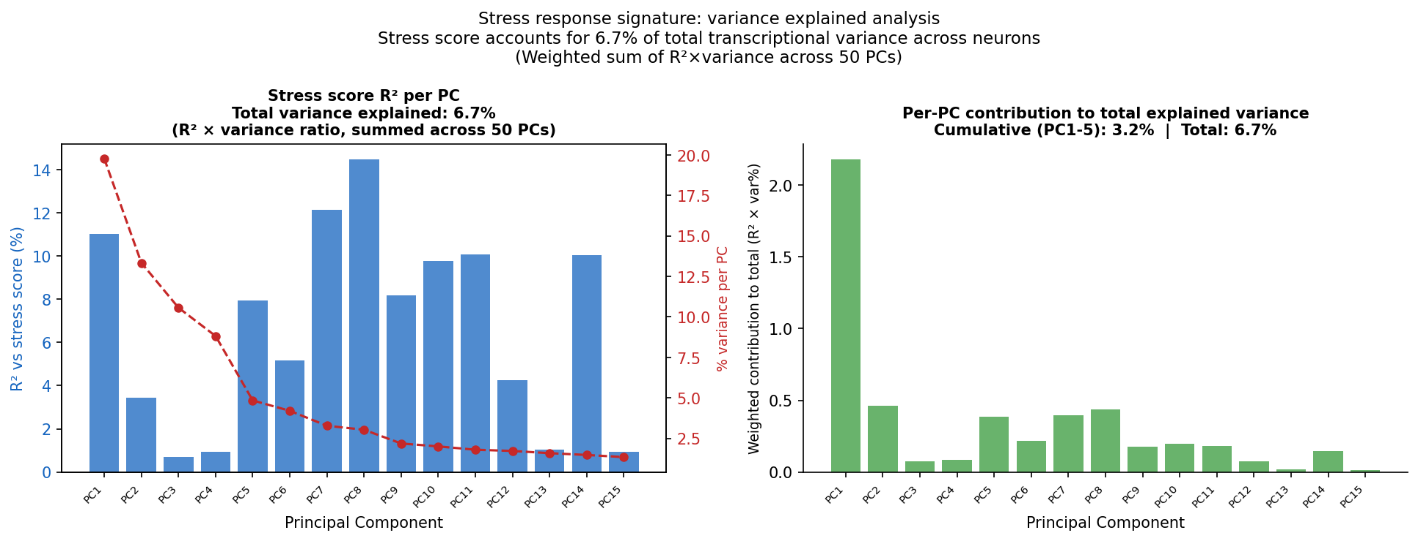


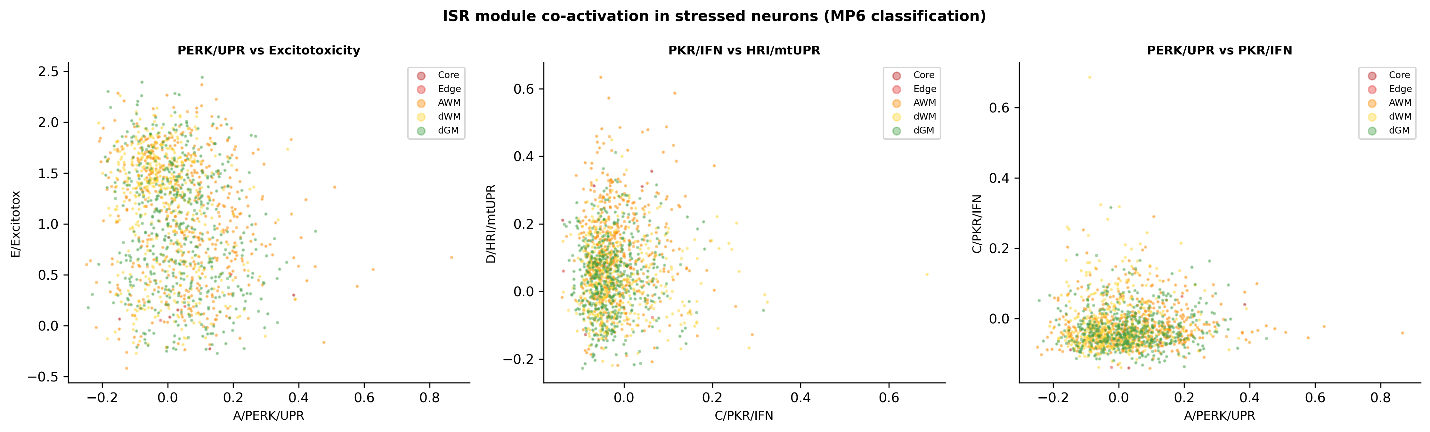


**Supplementary Figure 13. ISR kinase arm module dissection in stressed neurons.**

Multi-panel dissection of integrated stress response (ISR) module activation in MP6-stressed neurons (n = 8,401). (A) Expression of ISR core genes (ATF4, CHOP/DDIT3, GADD34/PPP1R15A, TRIB3) across stressed vs non-stressed neurons. (B) Kinase arm module scores (PERK/UPR, GCN2/kynurenine, PKR/interferon, HRI/mitochondrial UPR) in stressed vs non-stressed neurons (violin plots). (C) Mean kinase arm module scores in stressed cells across all four profiled cell types (neurons, OPCs, oligodendrocytes, astrocytes) × 5 ISR modules (heatmap). Excitotoxicity/IEG dominates in every cell type but is highest in neurons (0.714); PKR/IFN remains near baseline in all four. (D) Per-arm discriminating single markers. (E) Stress variance-explained decomposition across kinase arms. (F) Module co-activation patterns. The CHOP:GADD34 ratio in stressed neurons indicates an active resolution phase rather than chronic terminal stress. Gene-list compositions for all five ISR modules are given in Methods and Supplementary Table 14.

**
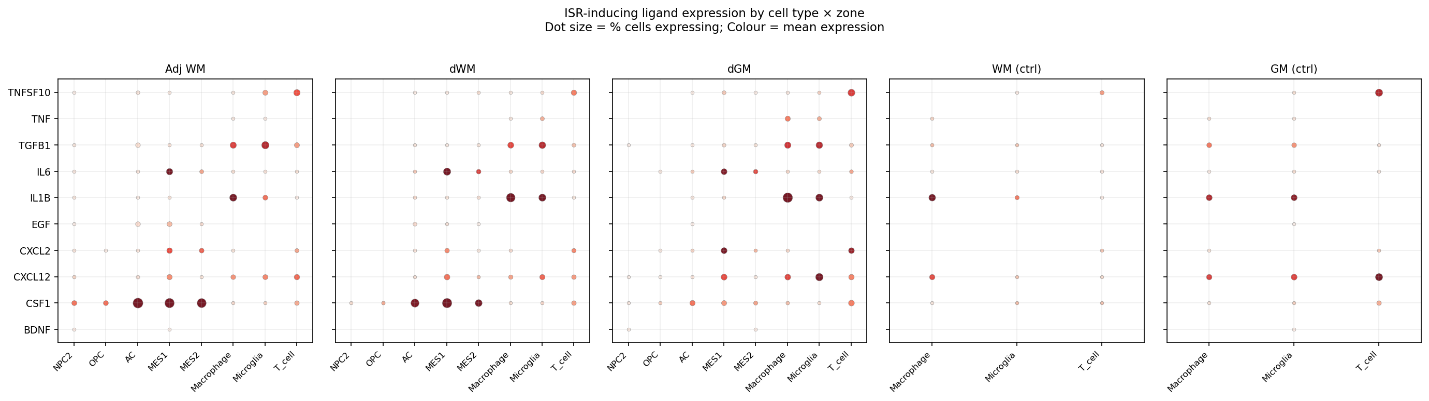
**

**Supplementary Figure 14. Candidate ISR-activating ligands in the GB tumour microenvironment.**

Dot plot showing mean log-normalized expression of candidate inflammatory and ISR-activating ligands (TNFSF10, TNF, TGFB1, IL6, IL1B, EGF, CXCL2, CXCL12, CSF1, BDNF) across cell types and spatial zones. Dot size = percentage of cells expressing the gene (detection rate); dot colour = mean log-normalized expression. Tumour-associated macrophages (MDM) and AC-like tumour cells are the principal expressing populations in Core and Edge zones, with expression declining across the spatial axis. These ligands are established activators of ISR kinase arms: TGFB1 activates PKR via type I IFN signalling; CXCL12 contributes to GCN2 pathway activation; the broader inflammatory panel (TNF, IL6, IL1B, CSF1) reflects tumour-associated paracrine signalling concomitant with ISR engagement. MIF and SPP1 (referenced in main text) are addressed in a separate ligand-receptor analysis.


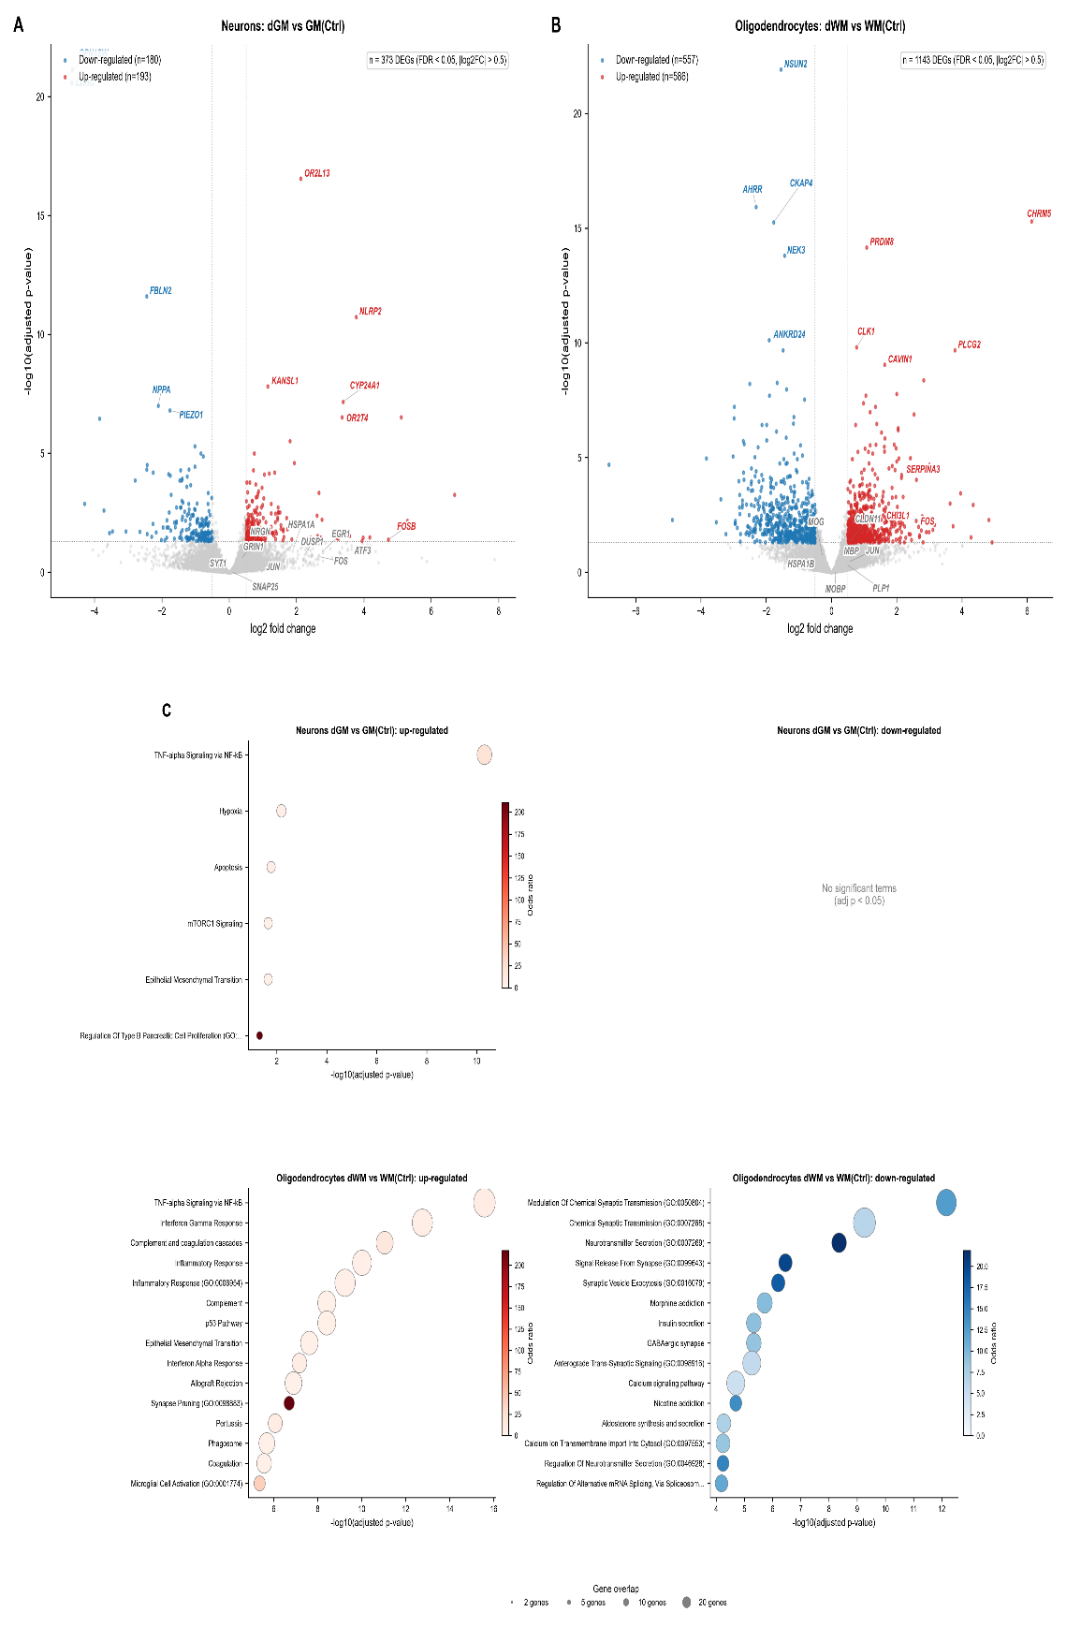


**Supplementary Figure 15. Distal zone differential gene expression and pathway enrichment.**

**(A)** Volcano plot: neurons dGM vs GM(Ctrl) (pseudobulk DESeq2), ISR and synaptic markers labelled. **(B)** Volcano plot: oligodendrocytes dWM vs WM(Ctrl). **(C)** GSEA pathway enrichment for both DEG sets (MSigDB Hallmark + GO_BP). n = 5 tumour vs 1 control.

**
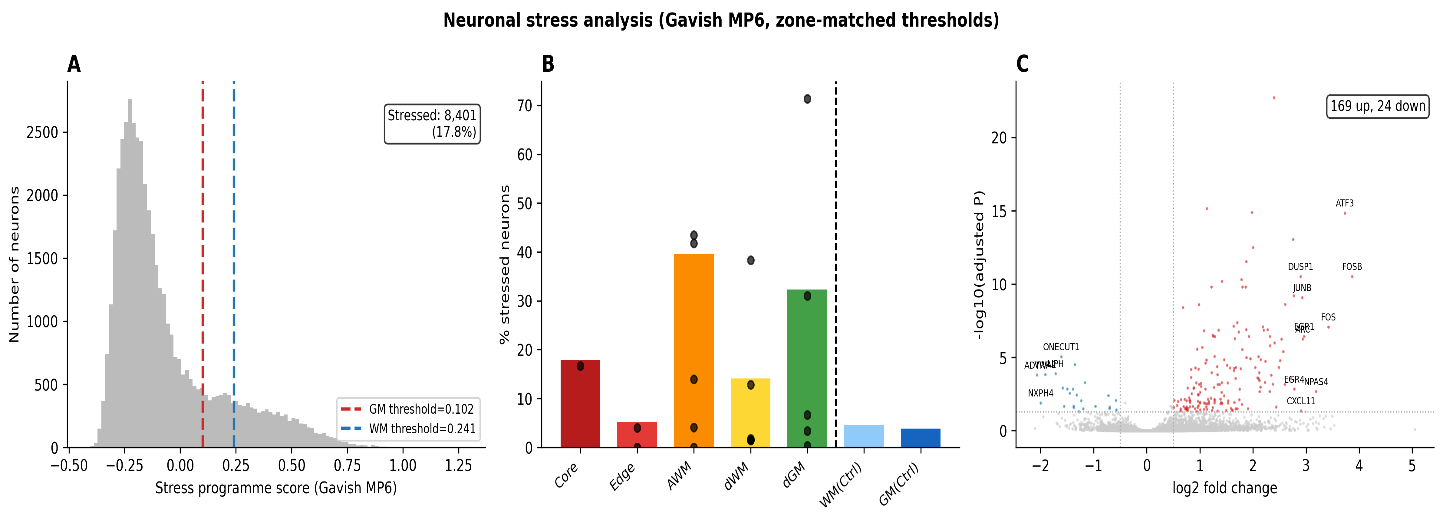
**

**Supplementary Figure 16. Stressed neuron characterisation and DEG analysis.**

(A) MP6 stress score distribution across all 47,262 neurons. Neurons were classified as stressed if their MP6 score exceeded a zone-matched threshold defined as the non-oncological control neuron mean + 2 SD, computed separately for white-matter zones (threshold = 0.241) and grey-matter zones (threshold = 0.102) to account for baseline differences in neuronal transcriptional state between tissue compartments. The histogram is coloured by stressed/non-stressed classification under this zone-matched scheme. (B) Percentage of stressed neurons per patient per zone; individual patient lines coloured, cohort mean overlaid in black. (C) Volcano plot of 169 upregulated and 24 downregulated genes (pseudobulk DESeq2; FDR < 0.05, |log2FC| > 0.5) comparing stressed versus non-stressed neurons across the five tumour patients. Top hits labelled. (D) Stressed-neuron counts per patient broken down by zone. n = 8,401 stressed / 38,861 non-stressed (17.8% of all neurons).

**
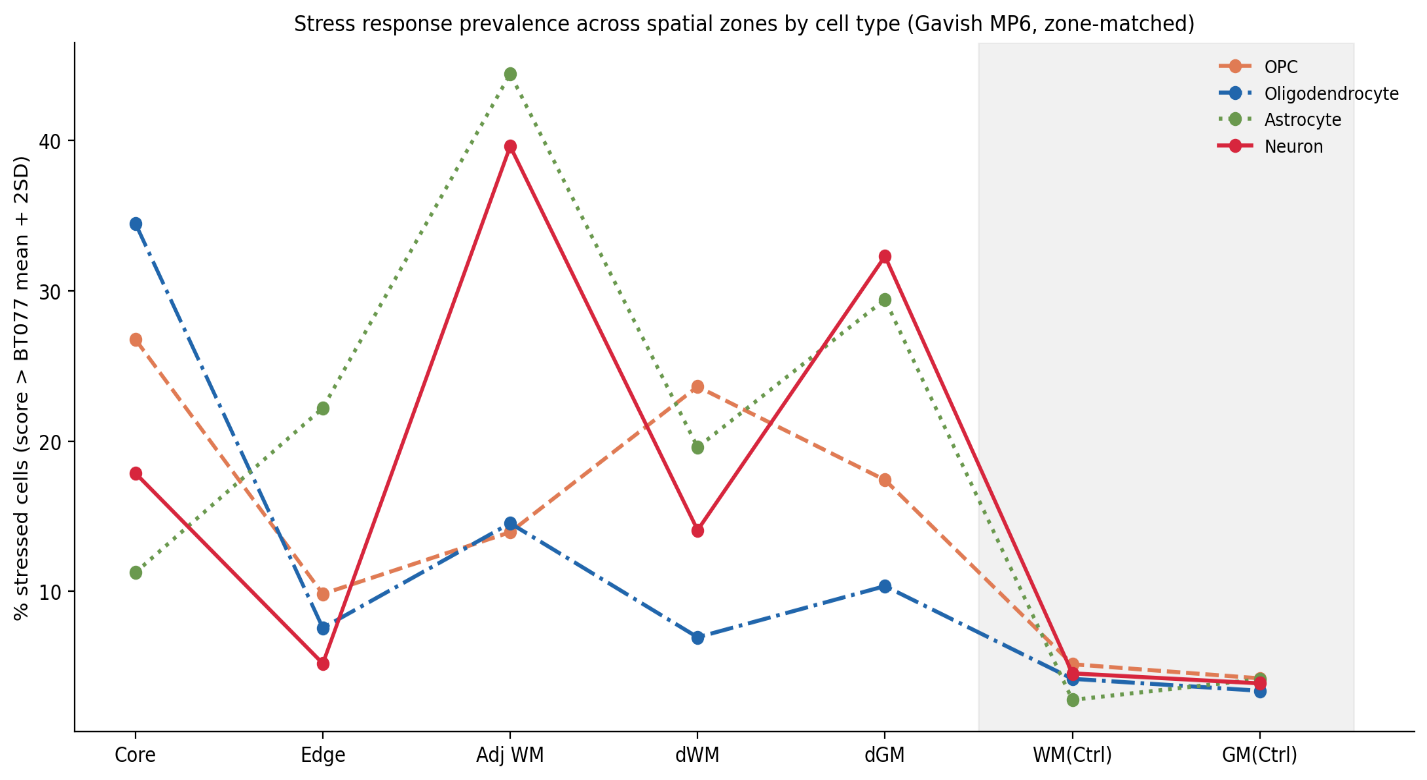

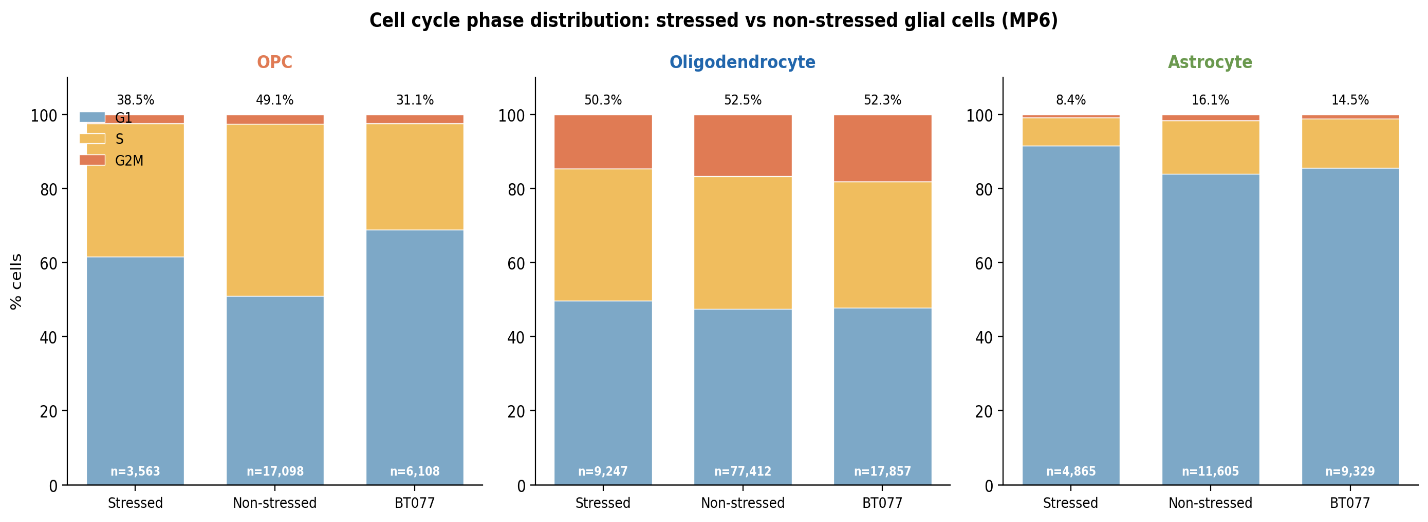
**
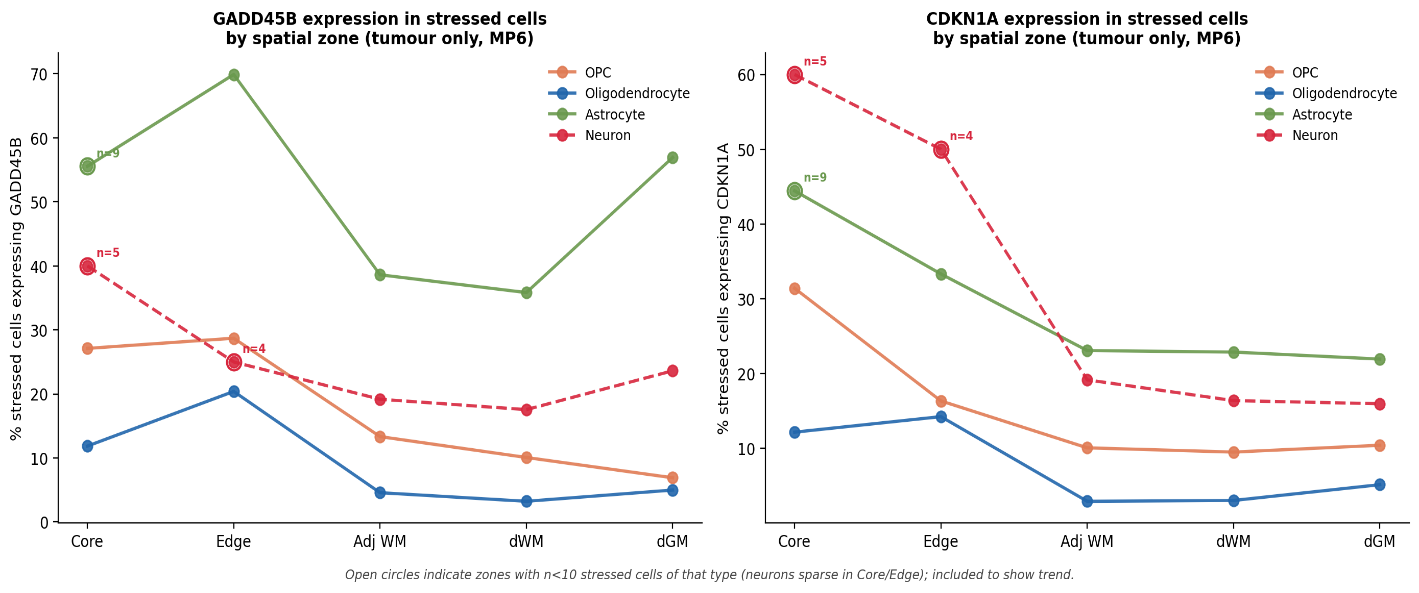

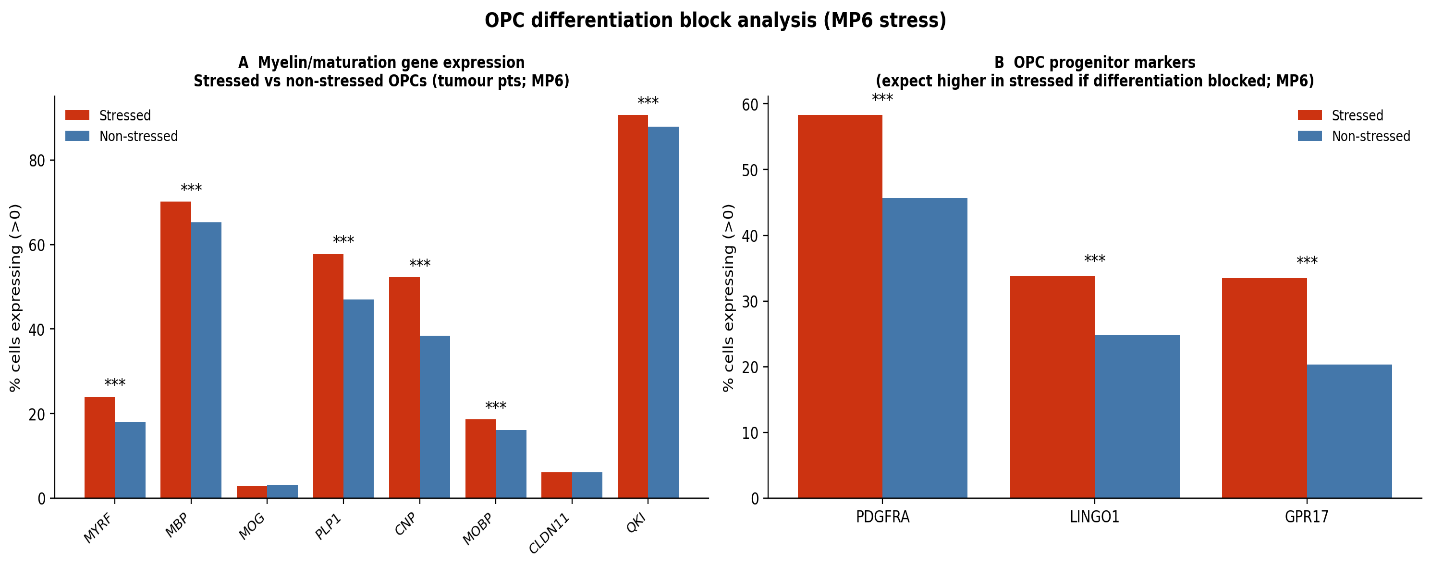

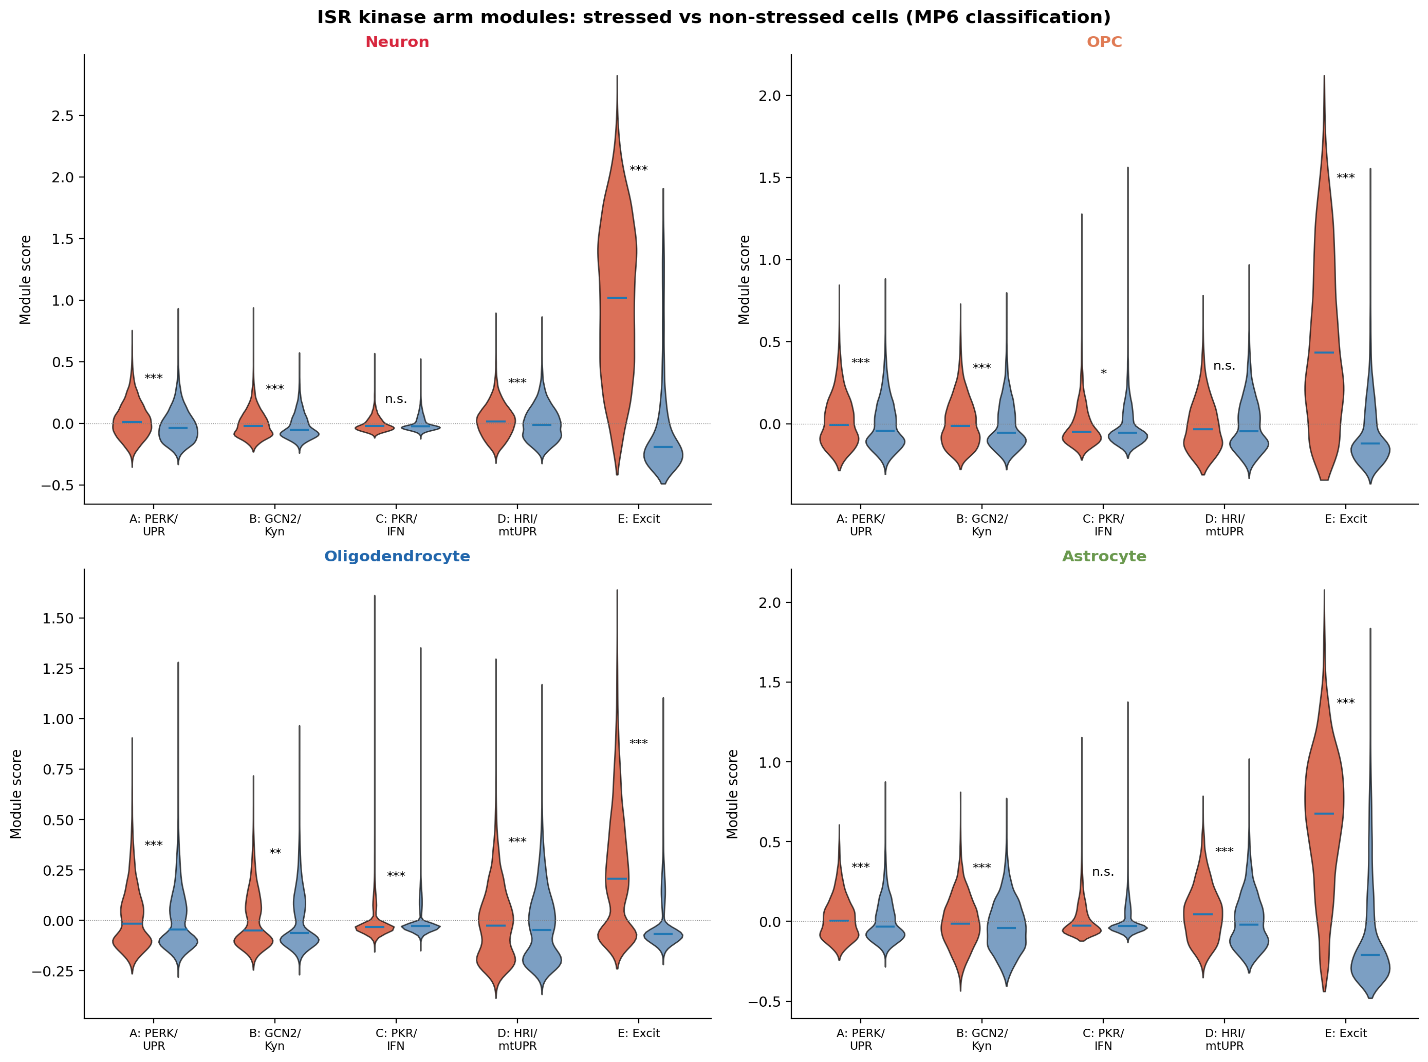

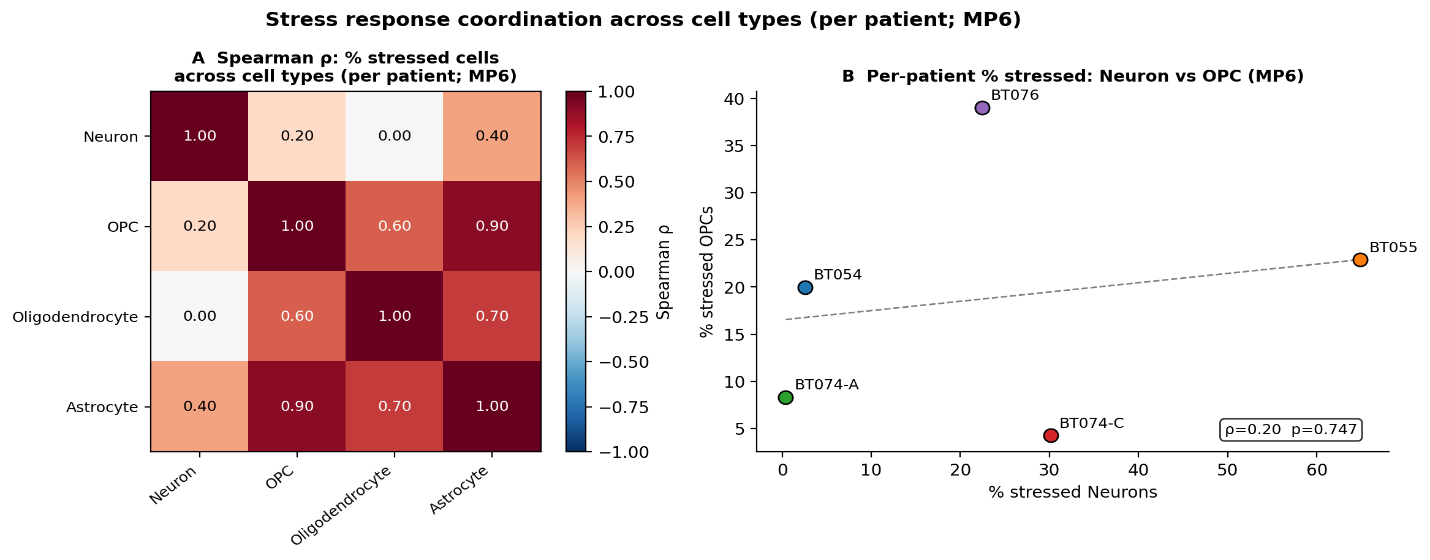


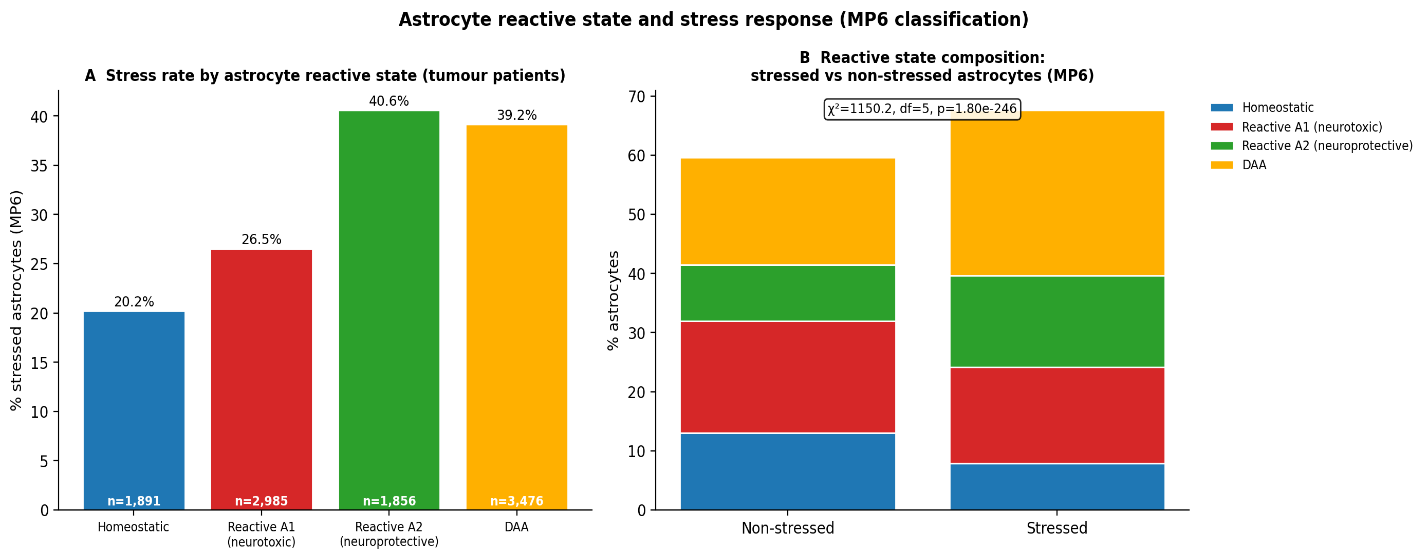

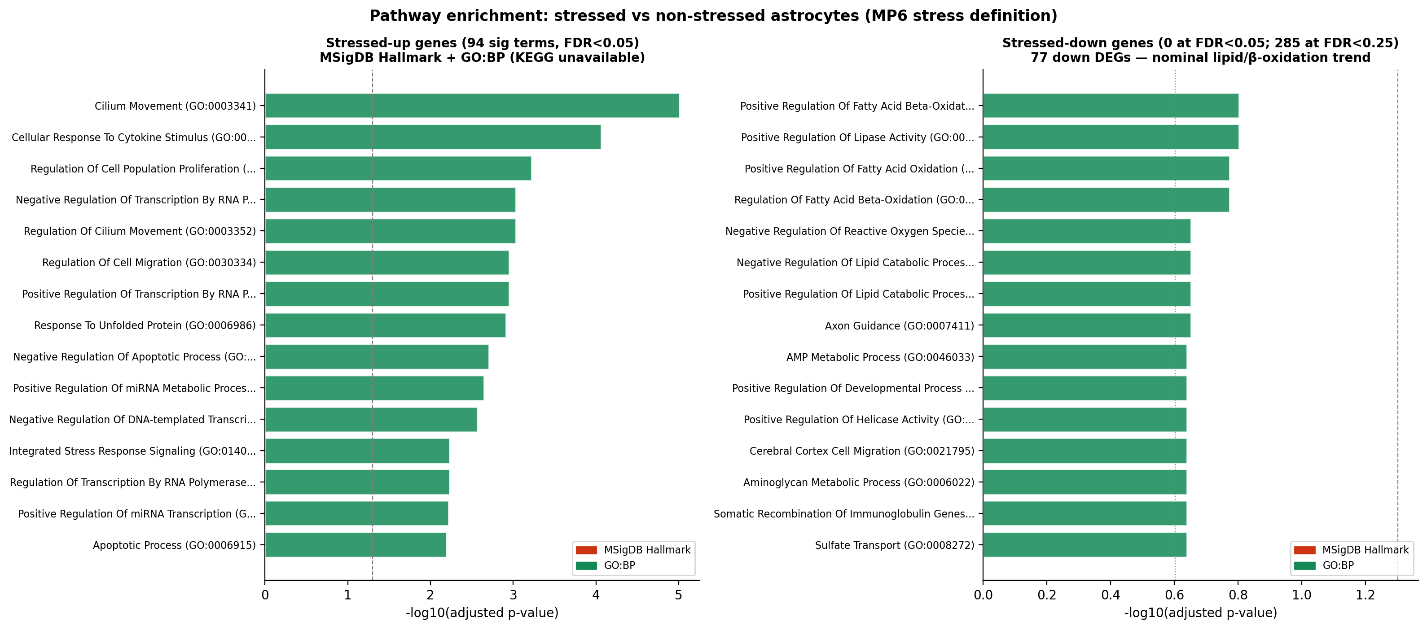


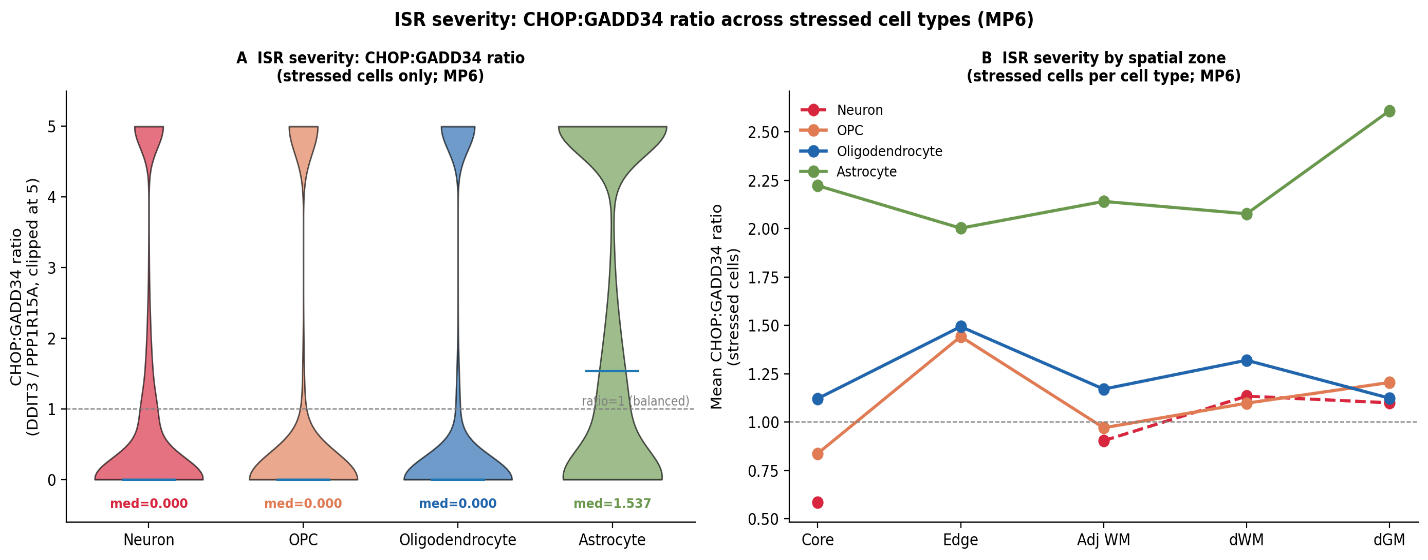


**Supplementary Figure 17. Stress response across non-malignant cell types and oligodendrocyte lineage analyses.**

(A) Percentage of stressed cells per zone for neurons, OPCs, oligodendrocytes, and astrocytes (MP6 stress score above zone-matched control mean + 2 SD; WM/GM thresholds applied separately). (B) Cell cycle phase composition (G1/S/G2M) in stressed vs non-stressed OPCs, oligodendrocytes, and astrocytes (neurons predominantly post-mitotic and excluded). (C) GADD45B and CDKN1A expression in stressed cells across the five tumour-patient zones for OPCs, oligodendrocytes, astrocytes, and neurons; open circles indicate zones with n<10 stressed cells of the indicated type (neurons sparse in Core/Edge), shown for trend visualisation only. (D) OPC transcriptional program differences (myelin maturity, progenitor markers) in stressed vs non-stressed OPCs. (E) Five ISR kinase-arm modules (PERK/UPR, GCN2/kynurenine, PKR/interferon, HRI/mitochondrial UPR, excitotoxicity/IEG) scored across all four cell types in stressed vs non-stressed cells (4×5 violin grid; Mann-Whitney significance markers). PKR/interferon shows no differential activation in stressed neurons. (F) Per-patient Spearman correlation matrix of percentage of MP6-stressed cells across the four cell types (n = 5 GB tumour patients), plus Neuron-vs-OPC %-stressed scatter annotated by patient (BT054, BT055, BT074-A, BT074-C, BT076). (G) Left: percentage of MP6-stressed astrocytes within each reactive state (Homeostatic, A1 neurotoxic, A2 neuroprotective, DAA) in tumour patients. Right: reactive state composition stratified by stress classification (stressed vs non-stressed astrocytes; χ² = 1150.2, df = 5, p = 1.8×10⁻²⁴⁶). (H) MSigDB Hallmark + GO:BP pathway enrichment for stressed-up vs stressed-down astrocyte DEGs (pseudobulk DESeq2; KEGG unavailable due to API rate-limit). No stressed-down terms reach FDR<0.05 (77 down DEGs); top suggestive terms at FDR<0.25 highlight a nominal lipid/fatty-acid β-oxidation signature, shown for completeness. (I) CHOP (DDIT3) : GADD34 (PPP1R15A) ratio in stressed cells per cell type and by spatial zone, with the ratio clipped at 5 to control for low-PPP1R15A outliers. n = 47,262 neurons; 26,769 OPCs; 104,516 oligodendrocytes; 25,799 astrocytes (stress definition: Gavish et al. 2023 MP6).


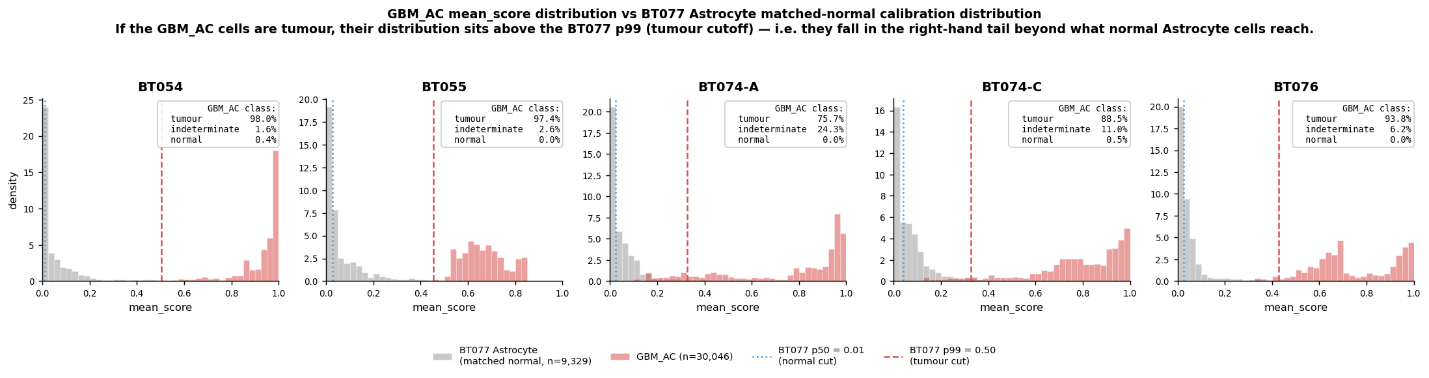

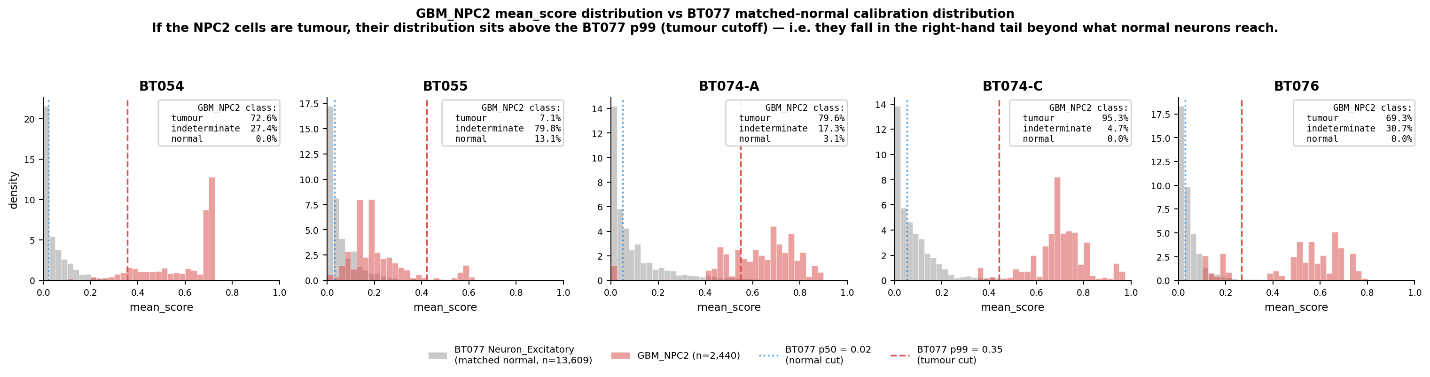

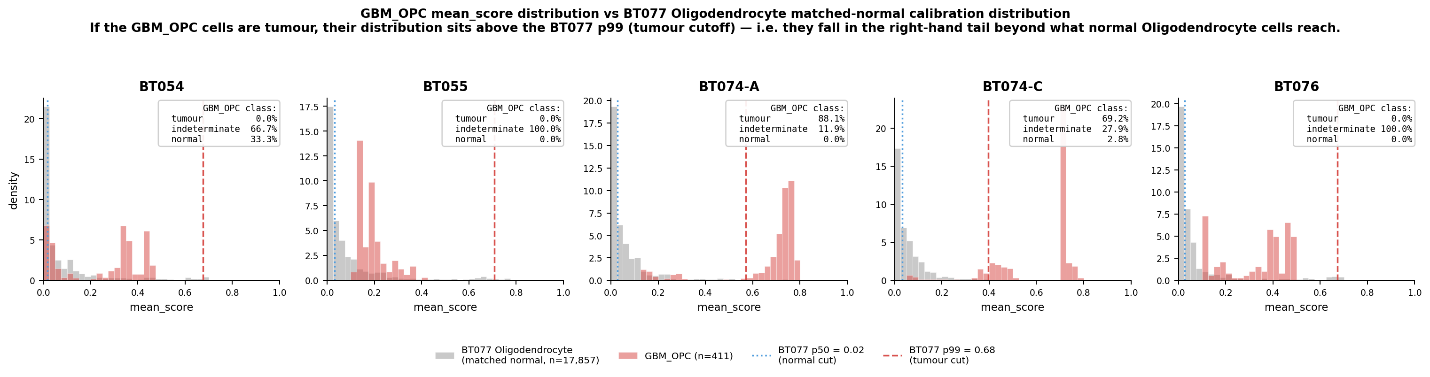

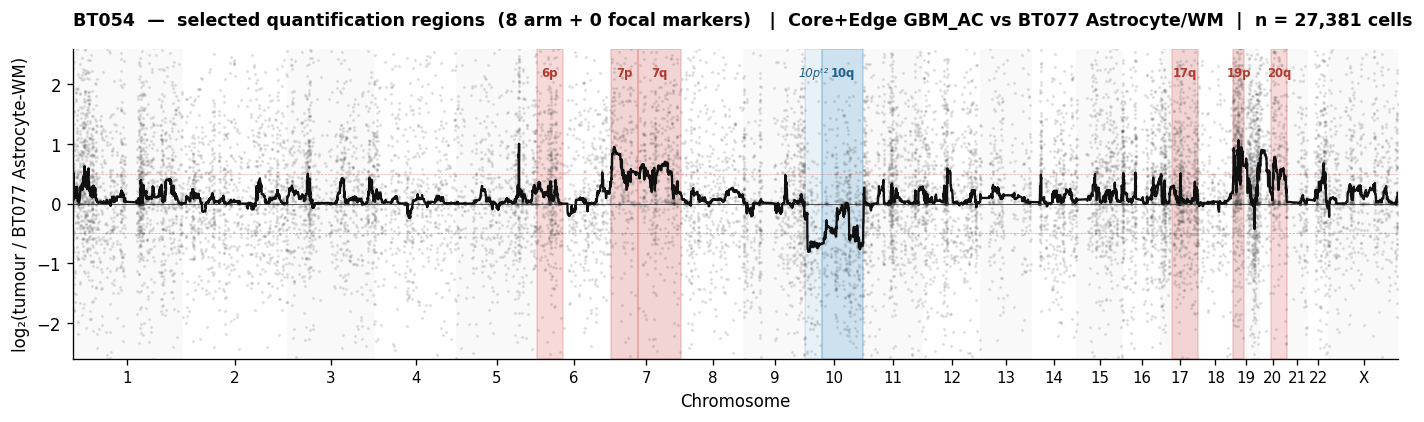

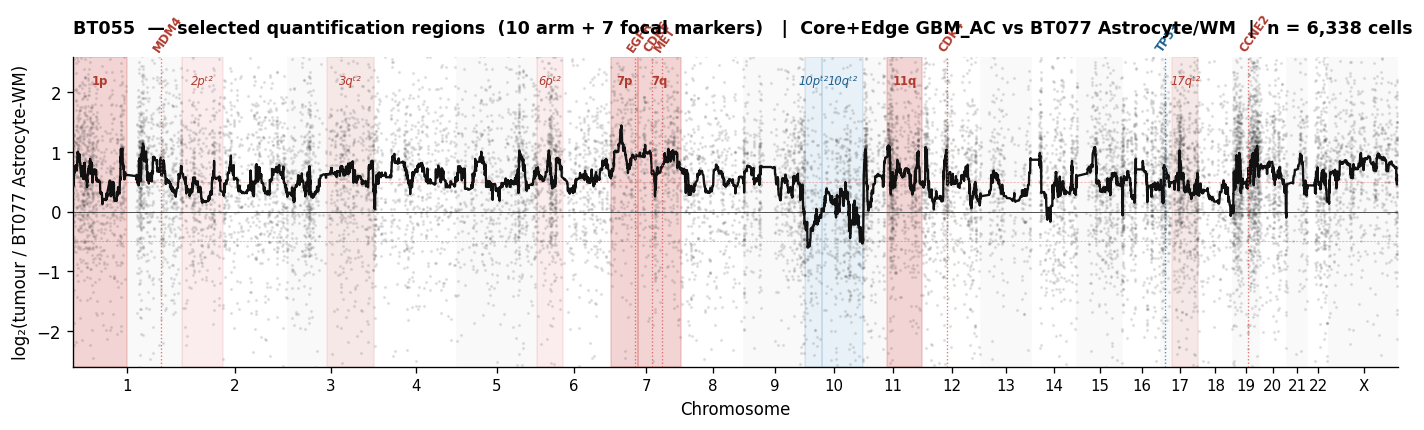

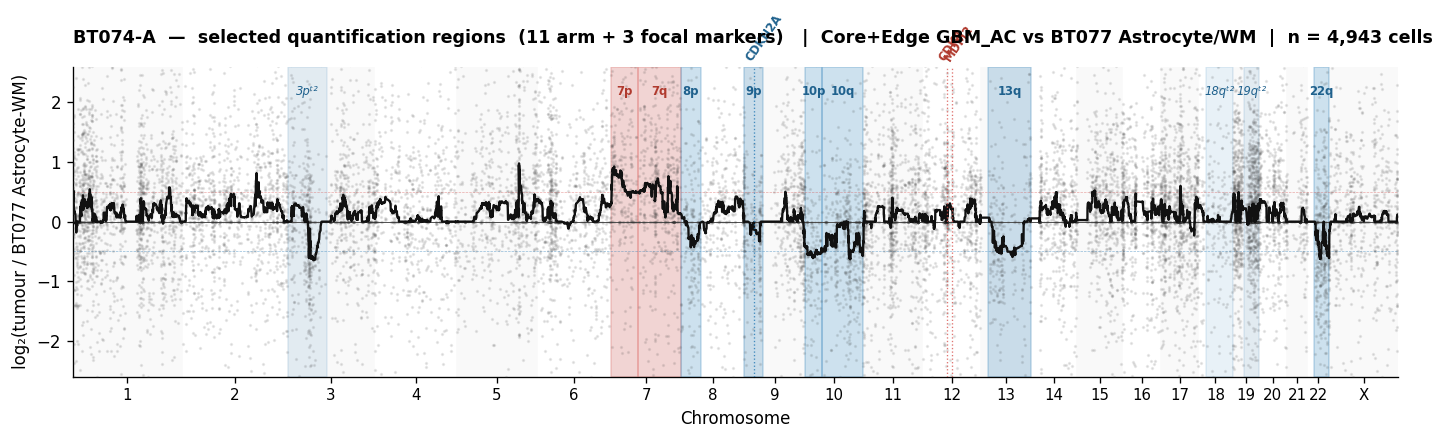

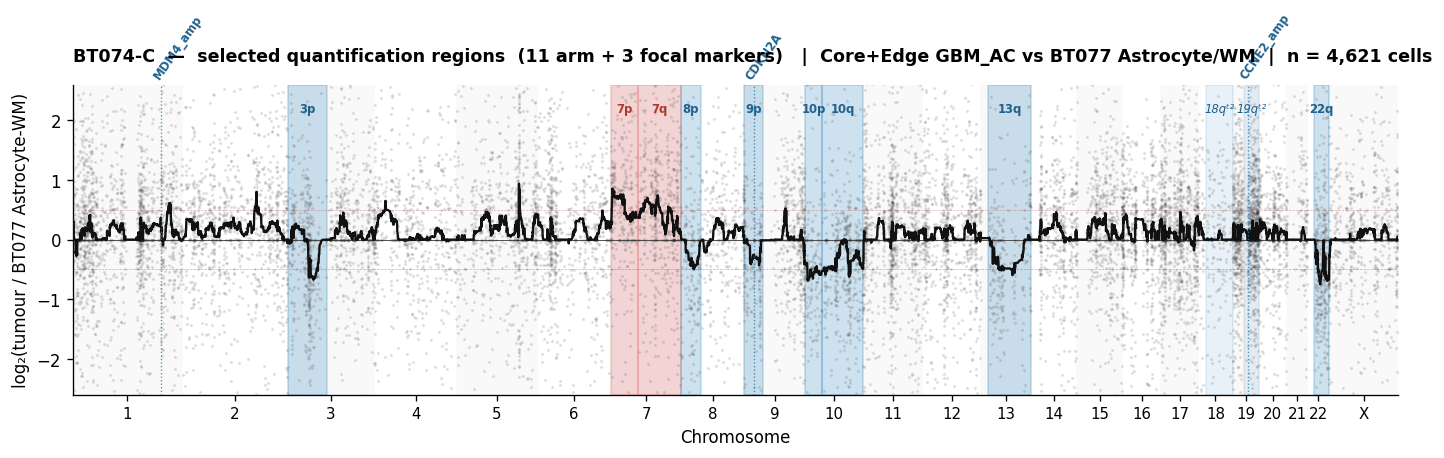

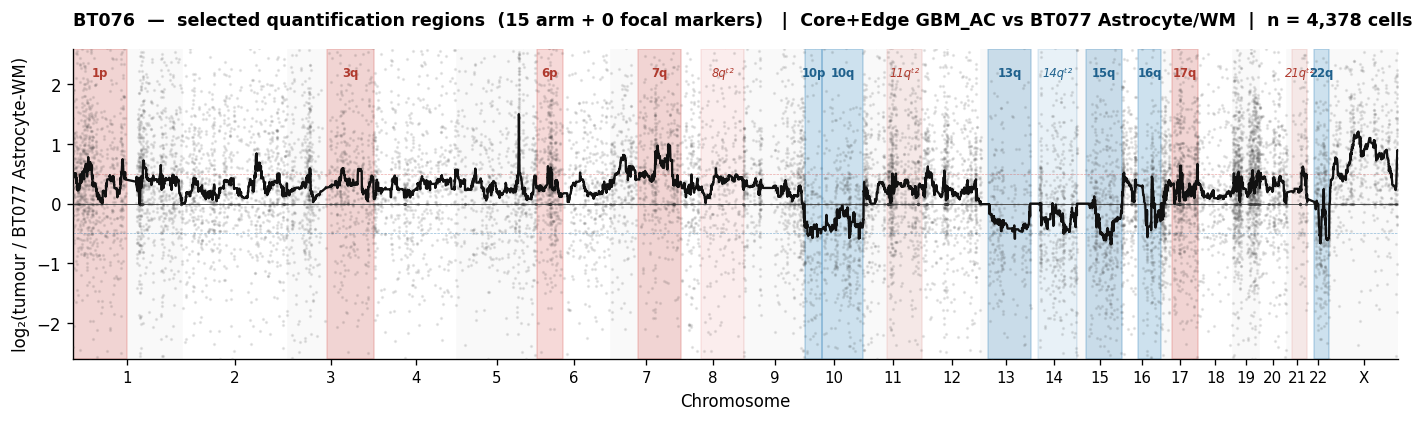

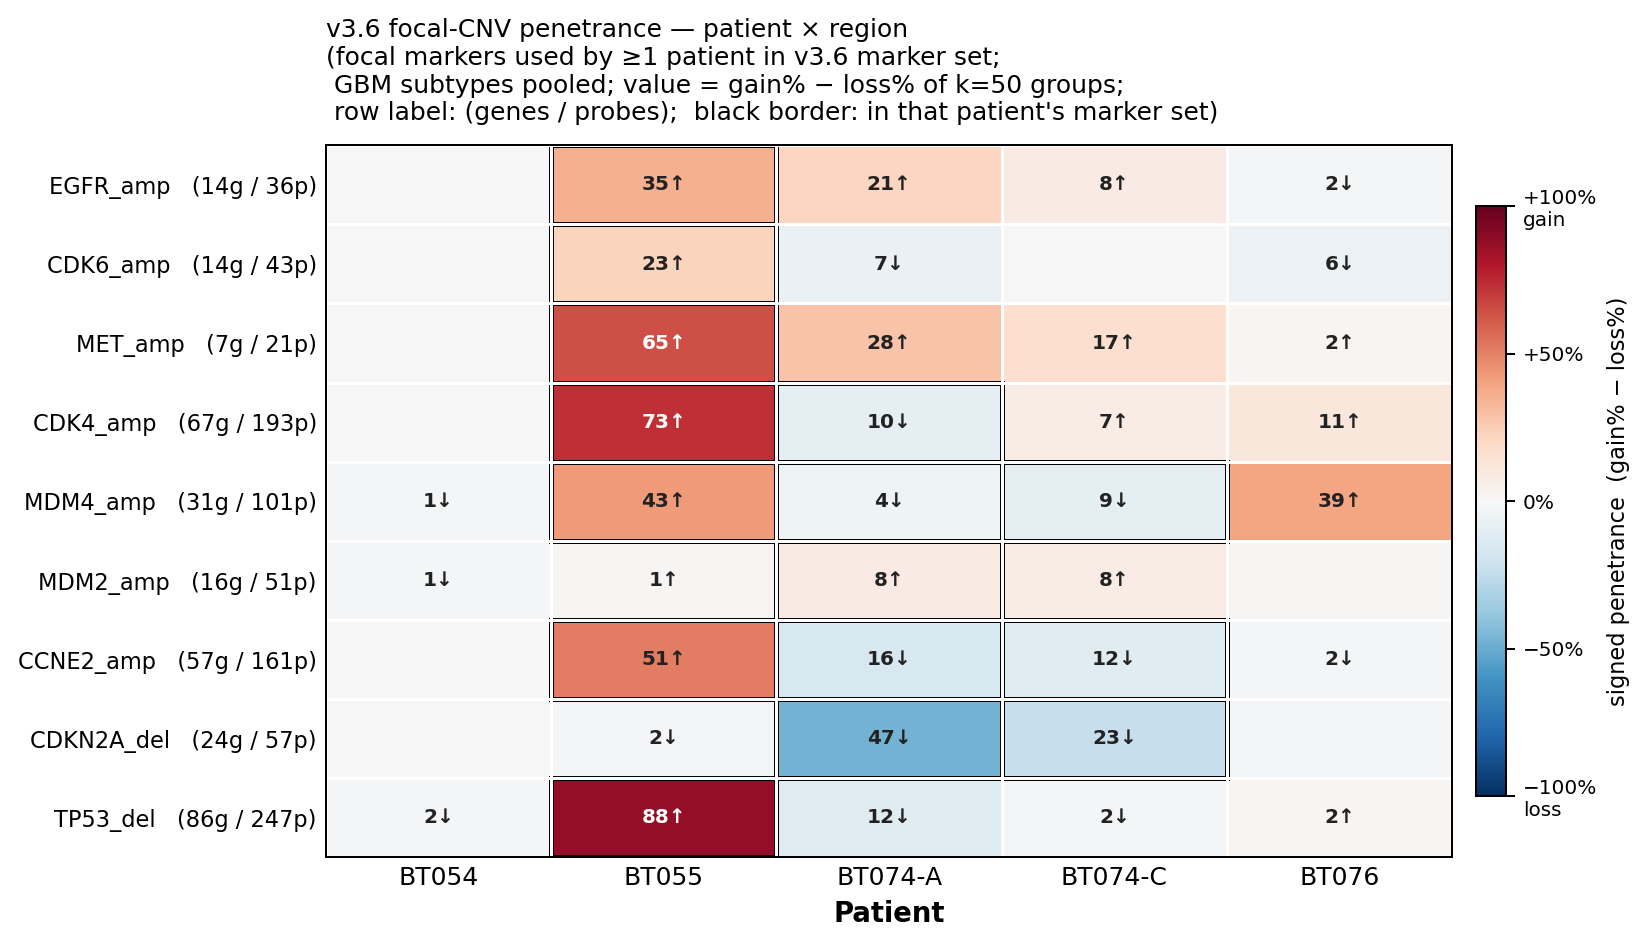


**Supplementary Figure 18. Per-cell CNV pipeline (cnv_group_flex v3.6) - calibration, per-patient signature, and focal-CNV penetrance.**

Validation outputs from the per-cell CNV classification pipeline. For each tumour patient, every malignant cell received a continuous mean_score ∈ [0, 1] derived from a tiered weighted aggregate of arm-gain, arm-loss, focal-gain and focal-loss markers, calibrated against an empirical null distribution generated from BT077 cells of the matched-normal reference cell type.

(A) GBM_AC mean_score distribution per tumour patient (red) overlaid on the BT077 Astrocyte matched-normal calibration distribution (grey). Vertical lines indicate the BT077-derived 50th percentile (dotted; normal cut) and 99th percentile (dashed; tumour cut) thresholds. Per-patient classification fractions (tumour / indeterminate / normal) are inset; AC-like cells reach the tumour cut in 75.7–98.0% of cells across the five patients. (B) Equivalent histograms for GBM_NPC2-like cells against the BT077 Excitatory Neuron reference. (C) Equivalent histograms for GBM_OPC-like cells against the BT077 Oligodendrocyte reference.

(D–H) Per-patient genome-wide log₂(tumour/reference) Manhattan plots (BT054, BT055, BT074-A, BT074-C, BT076), showing the smoothed per-region log₂ ratio across the 39 autosomal arms used in marker selection. Selected marker regions are highlighted; vertical bands mark the focal regions used in the v3.6 marker set. The number of arm and focal markers per patient is annotated on each panel.

(I) Patient × focal-CNV penetrance heatmap (pre-drift correction) for the nine GB-relevant focal regions (EGFR, CDK6, MET, CDK4, MDM4, MDM2, CCNE2, CDKN2A, TP53). Cell values give signed penetrance (gain% − loss% across k = 50 pseudobulk groups). Black borders highlight focal markers selected for that patient's marker library; "g" / "p" annotations indicate the number of genes / probes per region. The heatmap demonstrates patient-specific focal-CNV signatures (e.g., BT055 carries TP53 deletion and CDK4/EGFR/MDM4 amplifications; BT074-A carries CDKN2A deletion; BT076 carries MDM4 amplification), consistent with hallmark glioblastoma copy-number alterations.
